# Persistent parental RNAi in the beetle *Tribolium castaneum* involves maternal transmission of long double-stranded RNA

Thorsten Horn<sup>a</sup>, Kalin D. Narov<sup>b</sup>, Kristen A. Panfilio<sup>a,b,1</sup>

<sup>a</sup> Institute for Zoology: Developmental Biology, University of Cologne, Zùlpicher StraÙe 47b, 50674 Cologne, Germany

<sup>b</sup> School of Life Sciences, University of Warwick, Gibbet Hill Campus, Coventry CV4 7AL, United Kingdom

<sup>1</sup> Corresponding author: [Kristen.Panfilio@alum.swarthmore.edu](mailto:Kristen.Panfilio@alum.swarthmore.edu)

---

## ABSTRACT

Parental RNA interference (pRNAi) is a powerful and widely used method for gene-specific knockdown. Yet in insects its efficacy varies between species, and how the systemic RNAi response is transmitted from mother to offspring remains elusive. Using the flour beetle *Tribolium castaneum*, we report an RT-qPCR strategy to unmask the presence of double-stranded RNA (dsRNA) distinct from endogenous mRNA. We find that the injected dsRNA is directly transmitted into the egg and persists throughout embryogenesis. Despite this depletion of dsRNA from the mother, we show that strong pRNAi can persist for months before waning at strain-specific rates. In seeking the receptor proteins for cellular uptake of long dsRNA into the egg, we lastly present a phylogenomics profiling approach to ascertain macroevolutionary distributions of candidate proteins. We demonstrate a visualization strategy based on taxonomically hierarchical assessment of orthology clustering data to rapidly assess gene age and copy number changes, refined by several lines of sequence-based evidence. We use this approach to document repeated losses of SID-1-like channel proteins in the arthropods, including wholesale loss in the Heteroptera (true bugs), which are nonetheless highly sensitive to pRNAi. Overall, we elucidate practical considerations for insect pRNAi against a backdrop of outstanding questions on the molecular mechanism of dsRNA transmission to achieve long-term, systemic knockdown.

## Keywords

parental RNAi; systemic RNAi; dsRNA uptake; insects; *Tribolium castaneum*; RT-qPCR; phylogenomic profiling; SID-1; *zen1*; *chitin synthase 1*

## Short title

dsRNA transmission in *Tribolium*

## 45 INTRODUCTION

46

47 Since the demonstration of systemic RNA interference in insects about twenty years ago [1-  
48 3], this technique has become widely used for genetics research and there is growing interest  
49 in its application for species- and gene-specific pest management [4-9]. In many species,  
50 systemic knockdown is efficient across life history stages, with a particular advantage of  
51 parental RNAi. Delivery of dsRNA into the mother, often by a single injection, can achieve  
52 knockdown of both maternal and zygotic gene expression in offspring, including at  
53 postembryonic stages [10]. This technique can provide highly efficient gene knockdown in  
54 hundreds of embryos that are often collected for up to three weeks after injection (*e.g.*, [1,  
55 11]).

56

57 As a well-established model system, the red flour beetle *Tribolium castaneum* has  
58 been at the forefront of research on the RNAi mechanism [1, 10, 12] and for diverse genetics  
59 studies [13]. It is an effective RNAi screening platform [14-16]. pRNAi in *Tribolium* is  
60 regularly used for phenotypic investigation of development and to test genetic interactions  
61 singly or globally, such as by RNA-seq after RNAi [17-20]. Empirical work has shown that  
62 efficient RNAi is achieved through the introduction of long dsRNA into the organism, which  
63 persists longer *in vivo* and has more efficient cellular uptake than short interfering RNA  
64 (siRNA) [10, 21]. Supporting this, an early genomic survey of RNAi molecular machinery in  
65 *Tribolium* [12] confirmed conservation of many core elements, but also with notable absences  
66 or changes in copy number or function of some elements compared to the well understood  
67 RNAi system of *C. elegans*. This has generally been borne out by studies in other insect  
68 species [4, 5].

69

70 However, the mechanism of pRNAi is still poorly understood. Germline tissues and  
71 developing eggs have been studied as one of several tissue types that exhibit distinct  
72 susceptibilities to systemic knockdown in adult females. On the one hand, germline tissue  
73 showed lower levels of systemic effect in a pea aphid study in which this tissue was distal to  
74 the site of initial dsRNA delivery [9]. On the other hand, research in *C. elegans* has shown  
75 co-localization of dsRNA and yolk in oocytes, suggesting dsRNA transmission via a general  
76 mechanism for maternal provisioning of eggs [22].

77

78 A key element for elucidating systemic pRNAi is the ability to detect and track the  
79 dsRNA. In *C. elegans*, microscopy for visual detection of fluorescently labeled dsRNA  
80 showed that 50-bp dsRNA was transmitted to the oocyte [22]. However, this qualitative study  
81 did not examine embryos beyond the four-cell stage or test long dsRNA (~400 bp for efficient  
82 knockdown in *Tribolium*, [10, 15]). Visual tracking of fluorescently labeled dsRNA has been  
83 attempted in insects, but with limits on transmissibility and detection sensitivity [23, 24].  
84 Recent reviews on insect RNAi have thus explicitly called for the use of quantitative,  
85 sensitive detection methods such as RT-qPCR as a complementary approach: both to assay  
86 the extent of target gene knockdown after RNAi and for the systematic tracking of dsRNA  
87 [6]. RT-qPCR to assay knockdown is regularly used in developmental genetics research [19,  
88 20, 25], as one of several methods alongside global assays such as RNA-seq [17, 20] and  
89 spatiotemporally sensitive methods such as *in situ* hybridization, which can also detect inter-  
90 embryo variability (*e.g.*, [25]). To the best of our knowledge, these methods have thus far  
91 been used to measure expression levels of endogenous target gene mRNA, but not for dsRNA  
92 detection.

93

94 Here, we combine experimental results in *Tribolium* with comparative genomics  
95 assessments of gene repertoires across species to shed further light on the molecular  
96 mechanisms of dsRNA transmission during systemic pRNAi in insects. We present an RT-  
97 qPCR strategy whose amplicon design and sensitivity distinguishes dsRNA in offspring after  
98 pRNAi for genes with distinct temporal expression profiles, demonstrating its value for  
99 tracking throughout embryogenesis. Furthermore, we show that knockdown in progeny  
100 persists at high levels for months, despite a finite starting amount of dsRNA, through time-  
101 course analyses that evaluate female age, genetic strain, and different target genes. Lastly, we  
102 compare hundreds of sequenced animal genomes to reveal limits in the conservation of  
103 candidate receptor proteins for dsRNA uptake, emphasizing the specificity of the importer  
104 protein SID-1 to nematodes compared to insects or vertebrates. Thus, even as we provide  
105 empirical advances for investigation and application of pRNAi, we also flag multiple aspects  
106 of dsRNA transport that remain enigmatic.

## 109 RESULTS

### 111 dsRNA is transported into eggs and persists during embryogenesis

112 The homeodomain transcription factor Tc-Zen1 is a critical regulator in early development,  
113 specifying the identity of the extraembryonic serosal tissue that surrounds the embryo and  
114 confers mechanical, physiological, and immunological protection [18, 20, 26, 27]. During  
115 routine verification of *Tc-zen1* parental RNAi using RT-qPCR (as in [20]), we unexpectedly  
116 found that measured expression of *Tc-zen1* mRNA was higher in RNAi samples than in wild  
117 type under certain assay conditions, despite strong phenotypic validation of systemic  
118 knockdown (see Methods).

120 We observed this effect when using an RT-qPCR amplicon that was designed to be  
121 small and intron-spanning, ensuring efficient and specific amplification [28, 29]. However,  
122 due to the small size of the *Tc-zen1* mRNA transcript, this amplicon was also nested within  
123 the region used as an established multi-purpose template for dsRNA and *in situ* hybridization  
124 (Fig. 1A: Fragment 2, compared to the long dsRNA, [20, 25, 30]). Using this amplicon, at  
125 young embryonic stages we observed strong reduction to 25% of wild type levels in the RNAi  
126 sample, consistent with our phenotypic validation (Fig. 1B at 8-24 h: mean expression ratios  
127 of 1.24 RNAi/ 4.88 wild type for Fragment 2). In contrast, this amplicon produces higher  
128 expression estimates in RNAi than in wild type samples at the older stages assayed (Fig. 1B:  
129 yellow vs. red plot lines, developmental time  $\geq 16-24$  h). When the same samples are assayed  
130 with an RT-qPCR amplicon that only partially overlaps the dsRNA fragment (Fig. 1A:  
131 Fragment 1), we obtain the expected result of strong RNAi knockdown at all stages, including  
132 to only 5% of wild type levels at 8-24 h (mean expression ratios of 0.22 RNAi / 4.51 wild  
133 type), and no ostensible overexpression at older stages (Fig. 1B: blue plot lines).

135 Notably, the semi-nested amplicon detects the same levels of wild type expression as  
136 in our original assay (Fig. 1B: light blue and red plot lines, respectively). This corroborates  
137 the accuracy of the original, nested amplicon for quantification of *Tc-zen1* transcript levels.  
138 Moreover, these findings with either amplicon are consistent with our previous work that  
139 documented a single early pulse of *Tc-zen1* expression that peaks at 6-10 h before rapidly  
140 declining to undetectable levels for the rest of embryogenesis [20].

142 Thus, we infer that after *Tc-zen1* RNAi the nested RT-qPCR amplicon is detecting  
143 both residual endogenous transcript as well as dsRNA transmitted from the mother to the egg.

144 This implies that the ostensible overexpression represents the unmasked detection of dsRNA  
145 specifically at older developmental stages when wild type expression is low. Under standard  
146 culturing conditions, *Tribolium* embryogenesis is about three days, and here we show that the  
147 transmitted dsRNA stably persists in the egg throughout this interval (Fig. 1B: yellow plot  
148 line,  $\geq 16$ -24 h). Furthermore, although the nested fragment did capture the reduction in the  
149 target gene at a stage of high endogenous expression (8-24 h), the degree of transcript  
150 depletion after RNAi is likely underestimated due to the detection of the dsRNA (reduction to  
151 25% with nested Fragment 2 vs. to 5% with semi-nested Fragment 1). In summary, there is a  
152 certain amount of dsRNA transmitted from the mother to the offspring that is detectable by  
153 RT-qPCR, but at levels that may be masked by high endogenous expression.

154  
155

### 156 **The entire long dsRNA molecule is maternally transmitted**

157 The RNAi pathway involves processing of long dsRNA by the RNase III endonuclease Dicer  
158 to generate siRNAs of  $\sim 20$ -23 bp, which is the means of amplifying the RNAi effect to  
159 systemic levels [31]. Yet, our nested RT-qPCR amplicon is  $>100$  bp. We thus considered the  
160 possibility that the dsRNA is transmitted from the injected mother to the embryo as a largely  
161 intact, unprocessed molecule.

162

163 Our method to detect transmitted dsRNA relies on measuring different expression  
164 levels in the same sample with two different amplicons, one being partially outside of the  
165 dsRNA sequence. In theory, this method could also be used to determine the size of the  
166 transmitted dsRNA by increasing the length of the amplicons (*e.g.*, by extending Fragments 1  
167 and 2 in the 3' direction). Unfortunately, RT-qPCR analysis becomes increasingly unreliable  
168 with increasing amplicon size [29], and our results were inconclusive between biological and  
169 technical replicates with this strategy.

170

171 As an alternative approach, we could robustly measure the relative expression of a  
172 series of RT-qPCR amplicons that span the *Tc-zen1* transcript (Fig. 1A: Fragments 1-6). As  
173 wild type expression is negligible at 16-24 hours (Fig. 1B), the measured expression at this  
174 stage largely represents transmitted dsRNA present in the egg. Validating RNAi efficiency,  
175 the two amplicons that lay partially outside the dsRNA region show efficient knockdown of  
176 *Tc-zen1* at 16-24 hours (Fig. 1C: Fragments 1 and 6, mean reductions to  $\leq 25\%$  of WT levels).  
177 This is consistent with phenotypic validation and RT-qPCR assays of early developmental  
178 samples with high wild type expression (Fig. 1B: 8-24 h). In contrast, all amplicons that were  
179 fully nested within the dsRNA region show substantially increased expression after RNAi  
180 ( $>1000\%$ ; Fig. 1C: Fragments 2-5). Strikingly, there was a five-fold range in expression  
181 levels among the nested amplicons, an issue we address in the Discussion in terms of  
182 experimental design and gene-specific sequence features. Regardless, these four amplicons  
183 are each  $>100$  bp and together span 654 bp. We thus conclude that the entire 688-bp dsRNA  
184 molecule injected into the mother is transmitted to the egg.

185

186

### 187 **Unmasked dsRNA presence at stages of low expression is a general feature**

188 We next expanded our analyses to test whether maternal dsRNA transmission is a general  
189 feature of systemic RNAi in *Tribolium*. For this purpose, we chose two additional genes that  
190 have distinct, well-characterized expression time courses and molecular functions that differ  
191 from *Tc-zen1* and from one another. The first gene, *Tc-chitin synthase 1* (*Tc-chs1*), encodes a  
192 large, transmembrane enzyme that extrudes the polysaccharide chitin into developing cuticle  
193 of the serosa (early embryogenesis, [27]) and of the larval epidermis (late embryogenesis,

194 [32]). Secondly, in the nuclear GFP (nGFP) line [33], red fluorescence encoded by *DsRed*  
195 serves as a transgenic marker under the control of the synthetic Pax6 core promoter-enhancer  
196 element 3xP3, which drives late expression in the developing eyes and ventral nerve cord  
197 (central nervous system, [34, 35]).

198  
199 For both genes we detected greater expression in the RNAi samples with the nested  
200 amplicon compared to the semi-nested amplicon (Fig. 2A-B: yellow vs. dark blue plot lines).  
201 Furthermore, the effect was again most pronounced – with ostensible overexpression – at  
202 developmental stages when wild type expression is low: early embryogenesis for *DsRed*  
203 (4733%) and mid-embryogenesis for *Tc-chs1* (322%). As we had observed this effect in late  
204 embryogenesis for *Tc-zen1* (Fig. 1B), these results clarify that it is the level of endogenous  
205 expression, and not a specific developmental stage, that determines when dsRNA  
206 transmission can be unmasked by our RT-qPCR strategy. This is applicable whether the gene  
207 has a single stage of peak expression (*Tc-zen1*, *DsRed*) or a bimodal temporal expression  
208 profile with only a transient period of low expression (*Tc-chs1*). At stages when the target  
209 gene is moderately to strongly expressed, for both *Tc-chs1* and 3xP3-driven *DsRed* the nested  
210 amplicon underestimates the level of knockdown after RNAi by 5-20%, similar to what we  
211 had observed for *Tc-zen1*.

212  
213 We also verified the knockdown efficiency for *DsRed* in the nGFP line by observing  
214 red fluorescence in late embryos and young larvae (Fig. 2C-F). Fluorescent signal was  
215 detectable in >99% of untreated (wild type) larvae (n= 205) and absent in 93.1% of RNAi  
216 larvae (n= 159), consistent with very high efficiency knockdown.

217  
218  
219 **pRNAi is highly efficient for months before waning at strain-specific rates**

220 A single injection of the mother provides a finite number of dsRNA molecules, and the  
221 knockdown effect of pRNAi wanes over time in insects [1, 3, 36]. Our results suggest that  
222 waning may reflect not only endogenous transcript recovery after dsRNA degradation in the  
223 mother, but also maternal depletion of dsRNA due to its direct transmission into offspring.  
224 To determine how long pRNAi knockdown persists in *Tribolium*, we conducted time course  
225 experiments until the knockdown effect had fully waned, testing different genes, genetic  
226 backgrounds, and ages of adult female. For this purpose, larval cuticle preparations were  
227 used as a robust phenotype assay (see Methods), targeting two genes whose knockdown  
228 produces distinctive and easily scorable cuticle phenotypes with high penetrance (Fig. 3A-C):  
229 *Tc-tailup* (*Tc-tup*, [15, 37, 38]) and *Tc-germ cell-less* (*Tc-gcl*, [39]).

230  
231 Across beetle strains and target genes, >90% penetrance for gene-specific knockdown  
232 in embryos is achieved within three days after adult injection and remains persistently high  
233 for nearly two months at 30 °C (Fig. 3D: Experiments 1, 3a, and 3b). Only in our aged female  
234 experiment did we see a delay in onset of knockdown and lower overall levels of penetrance  
235 (generally 50% over a 30-day interval; Fig. 3D: Experiment 2). Nonetheless, across all  
236 experiments we still observed 50% phenotype penetrance at 42-71 days after injection. A  
237 minor resurgence (<10%) after full depletion of the RNAi phenotype occurred briefly towards  
238 the end of both Experiments 2 and 3a.

239  
240 In contrast to the consistent duration of strong knockdown, the rate of waning may be  
241 strain-specific, irrespective of female age or target gene. In Strain 1, knockdown fully  
242 declined in a 10-day interval (from 91% or 78% to 0% in Experiments 1 and 2, respectively).

243 Waning in Strain 2 was more gradual, spanning the better part of a month (from ~86% to 0%  
244 over 20-34 days in Experiments 3a and 3b).

245

246

### 247 **pRNAi waning and transient fluctuations are strain- and female-specific**

248 Since our experimental beetle populations were maintained as pooled cohorts, we examined  
249 female lethality and fecundity to more precisely document the pRNAi waning effect (Fig. 3E-  
250 H).

251

252 Regarding survival (Fig. 3E), the dsRNA-injected females exhibited minor fatalities  
253 within the first week after injection before the populations stabilized over the next 1-2  
254 months, until death occurred from presumed old age. The exception to this trend was in  
255 Experiment 2, where females were already aged for 5.3 months as adults before injection and  
256 subsequent mating: these injected females showed steady mortality for the first 2.5 weeks  
257 before the population stabilized through the second month of the experiment. Fatalities of the  
258 uninjected (wild type) females and males were minimal in all experiments.

259

260 We then determined fecundity in terms of egg output per female per day (Fig. 3F).  
261 Age is the strongest predictor of female fecundity; neither the background genetic strain nor  
262 dsRNA injection had an appreciable effect. Fecundity fluctuates on short time scales (<1  
263 week), but overall we find a marked but inexplicable increase in fecundity at 50-75 days, with  
264  $\geq 6$  eggs/female/day. After, there is a rapid decline to 130 days, and persistent, low-level  
265 fecundity through 230 days.

266

267 In sum, we find that on multi-month timescales both survival and egg output of RNAi  
268 females is comparable to that of the uninjected controls, indicating that long-term activity of  
269 RNAi machinery does not generally impair female physiology or fecundity.

270

271 Arguably, intermediate RNAi penetrance at the population level could reflect  
272 offspring contributions from a mix of females with strong RNAi and resistant females that  
273 only lay wild type offspring. Then, waning of RNAi over time might reflect the earlier death  
274 of the females that produced affected offspring. However, our data support the waning of  
275 RNAi in individual females. Firstly, for months we obtained exclusively affected offspring  
276 (100% RNAi phenotype) before eventually obtaining 0% phenotype (Fig. 3D: Experiments 1,  
277 3a, and 3b). Secondly, RNAi penetrance fluctuates and wanes even when the number of  
278 females and egg laying rate are steady (Fig. 3G-H). Thus, while we cannot formally exclude  
279 individual differences in reproductive senescence [40], decline in RNAi penetrance was not  
280 simply due to death of females in which RNAi was more effective.

281

282

### 283 **Multiple, independent losses of the dsRNA importer SID-1 in arthropods**

284 For the transit of dsRNA through the mother to the egg, diverse receptor proteins have been  
285 implicated in dsRNA cellular uptake and oocyte provisioning. In widening our investigation  
286 of the molecular mechanisms of pRNAi, we took a phylogenomic approach to explore the  
287 potential relevance of selected receptor proteins in insects. Moreover, our analyses  
288 demonstrate a systematic approach for conservation assessments that combines extensive  
289 orthology clustering datasets with curation and phylogenetic analysis.

290

291 RNAi requires that dsRNA is taken up into the cells of the body, where Dicer acts in  
292 the cytosol [4, 5]. The SID-1 protein is a transmembrane importer of long dsRNA and has

293 been a central focus of RNAi research. First characterized in *C. elegans* [41], it is one of  
294 several functionally related proteins whose absence causes a systemic RNA interference  
295 deficient (SID) phenotype (reviewed in [42, 43]). Conservation of SID-1 is in fact notably  
296 variable across insect species, with homologues somewhat agnostically referred to as SID-1-  
297 like (SIL) or SID-1-related (Sir) [12]. Nonetheless, ever since early recognition of SID-1  
298 homologues in *Tribolium* and vertebrates [41], it is routinely sought when characterizing  
299 RNAi components in new transcriptomes and genomes (see Discussion).

300  
301 In the last five years the substantial increase in available genomic resources,  
302 particularly for the wider diversity of insects [44], enables a more systematic approach based  
303 on official gene set (OGS) data from sequenced genomes. Here, we make use of the latest  
304 version of the orthology clustering database OrthoDB to survey 148 insect species, embedded  
305 in the evolutionary framework of 448 metazoan animal species ([45], Fig. 4: cladogram).

306  
307 Our assessments of orthology group membership at the hierarchical taxonomic levels  
308 of Insecta, Hexapoda, Arthropoda, and Metazoa substantially extend previous observations on  
309 the distribution of SID-1 (Fig. 4: “SID-1/SIL distribution”; see Methods and Discussion).  
310 Across the Metazoa, SID-1 proteins are present in 375 species, with multiple copies found in  
311 235 of these species. As previously documented with limited sampling [12], we find lineage-  
312 wide copy number increases within each of the sarcopterygian vertebrates (the lobe-finned  
313 fishes clade, including mammals), Coleoptera (beetles), and Lepidoptera (moths and  
314 butterflies). This includes the three SIL proteins originally characterized in *Tribolium* [12].  
315 At the same time, SID-1 is absent from all 56 species of Diptera and 7 Acari species,  
316 augmenting previous reports [46, 47]. Furthermore, we newly report the complete absence of  
317 SID-1 homologues in an additional, independent lineage: the Heteroptera (true bugs) within  
318 the insect order Hemiptera (Fig. 4). To corroborate these evolutionary changes, we further  
319 scrutinized OGS, genome assembly, and transcriptome analysis data.

320  
321 Orthology clustering indicates the lineage-specific loss of SID-1 within the Hemiptera  
322 based on its absence in five Heteroptera and presence in eleven outgroup species (formerly  
323 the paraphyletic “Homoptera”, including aphids, psyllids, and planthoppers; Fig. 4). To  
324 augment species sampling, we compiled recently published results and conducted BLAST  
325 investigations of assembled genomes (see Methods), nearly doubling the number of species  
326 investigated (Fig. 5A). Importantly, directly interrogating genome assemblies overcomes  
327 limitations of OGS gene model predictions [48, 49]. Our tBLASTn searches with diverse SIL  
328 orthologue queries did not detect any heteropteran or dipteran sequences but did recover all  
329 SIL proteins in other insects (Fig. 5B). Thus, loss of SID-1/SIL spans the four major  
330 infraorders of Heteroptera (10 species) compared to its retention in other Hemiptera (present  
331 in 15 species, with absences confined to three taxonomically scattered species with limited  
332 transcriptomic evidence; Fig. 5A).

333  
334 Even with more extensive species sampling than was previously possible [12, 46],  
335 some of the same phylogenetic ambiguities of SIL proteins remain (Figs. 5C, S1). Within  
336 *Caenorhabditis* nematodes, SID-1 has high sequence similarity to the functionally unrelated  
337 TAG-130/CHUP-1 protein (Figs. 4, 5C; [12]). Our phylogenies are generally robust for  
338 topology within clades for the insects and the deuterostomes, but the long-branch nematode  
339 proteins are unstable. Two nematode species with single-copy orthologues have particularly  
340 long branches and tend to show affinity with *Caenorhabditis* TAG-130. However, the  
341 recovery of well supported clades for each of SID-1 and TAG-130 in *Caenorhabditis* species  
342 is inconsistent (Fig. S1A-C). In our phylogeny with broad species sampling, all arthropod

343 and deuterostome proteins show greater affinity to nematode SID-1 (Fig. 5C). Lineage-  
344 specific duplications appear ancestral, with a single duplication at the base of the  
345 sarcopterygian vertebrates and the beetles, and two at the base of the Lepidoptera (Figs. 5C,  
346 S1B,D, but with unstable topology for *Tribolium* SirB). The Hymenoptera (wasps, bees) are  
347 an outgroup to other Holometabola, yet their single-copy SIL orthologues group elsewhere  
348 (Figs. 5C, S1D). Overall, sequence-based assessments of SID-1/SIL conservation are  
349 complicated by lineage-specific duplications and rates of sequence evolution, even before its  
350 functional relevance for RNAi in insects is considered (see Discussion).

351  
352

### 353 **Maternal provisioning uses distinct receptor proteins in insects and nematodes**

354 An alternative, long-recognized mechanism of dsRNA cellular uptake is endocytosis, for  
355 which core genes are widely conserved as standard eukaryotic cellular machinery [4, 42].  
356 Receptor-mediated endocytosis also supports maternal provisioning of oocytes, and it has  
357 been proposed for invertebrates that yolk proteins (vitellogenins) and dsRNA may share a  
358 common import mechanism [22, 23]. We thus applied our phylogenomic approach to  
359 determine conservation of the vitellogenin receptor (VgR), known as Yolkless (Yl) in  
360 *Drosophila* (Figs. 4, 5D).

361

362 We find a fundamentally different distribution for VgR compared to SID-1 (Fig. 4:  
363 “VgR/Yl distribution”). Whereas SID-1 had orthology group members extending to the non-  
364 bilaterian Metazoa, VgR is essentially restricted to the Ecdysozoa, excluding the Nematoda.  
365 Secondly, whereas there is evidence for multiple VgR proteins in other arthropod groups, this  
366 protein is predominantly single-copy throughout the insects, including the Heteroptera and  
367 Diptera, and the Coleoptera and Lepidoptera – which lost or duplicated SID-1, respectively.  
368 Unlike SID-1, for VgR there are also scattered single-species absences throughout the  
369 hexapod orders.

370

371 Curiously, two species are the sole exception to the complete absence of vertebrate  
372 protein members from the metazoan VgR orthology group (Fig. 4). Our phylogenetic  
373 appraisal centered on this anomaly. We obtain two strongly supported clades containing  
374 either insect VgR or the deuterostome proteins, with a paraphyletic splitting of non-insect  
375 arthropod proteins between these two clades (Fig. 5D). Tracking the vertebrate proteins into  
376 the more taxonomically restricted Vertebrata orthology group revealed that these proteins are  
377 divergent members of the Very Low-Density Lipoprotein Receptor (Vldlr) proteins, which are  
378 conserved in all 243 vertebrate species. In summary, the broad distribution patterns suggested  
379 by orthology clustering alone are valid, with our follow-up analyses refining this to strongly  
380 support a hexapod-specific origin of VgR. Thus, for the purposes maternal provisioning of  
381 oocytes, nematodes and insects rely on distinct receptors.

382

383

## 384 **DISCUSSION**

385

386 Our tripartite investigation of the molecular mechanism of pRNAi in *Tribolium* combines (1)  
387 an RT-qPCR strategy that detects dsRNA transmitted to the egg, (2) time course assays that  
388 show months-long persistence of pRNAi under different parameters, and (3) a phylogenomics  
389 profiling approach for appraisal of candidate genes’ taxonomic distributions. Our surprising  
390 empirical observations can inform experimental design for developmental genetics studies  
391 and targeting strategies for RNAi-based pest management applications. Furthermore, we



392 highlight several key steps at which the cellular mechanism of dsRNA transport remains  
393 unresolved, despite highly effective use of RNAi in insects for decades [1, 2, 5, 6, 15].  
394

395  
396

### **Amplicon design and developmental staging determine measured knockdown efficiency**

397 We show that comparison of RT-qPCR results between nested and semi-nested amplicons is a  
398 robust method for detection of maternally transmitted dsRNA in eggs (Figs. 1-2).  
399 Complementing short-term tracking of fluorescently labeled dsRNA [6, 22, 23], our method  
400 detects dsRNA throughout embryogenesis. On the other hand, use of a nested amplicon alone  
401 may lead to underestimation of knockdown efficiency, or even to erroneous interpretations of  
402 target gene overexpression, depending on endogenous expression levels. Awareness of these  
403 features can be applied to tracking dsRNA and to mitigate against unwanted dsRNA detection  
404 in single-amplicon assays.  
405

406

407 For a gene of interest, primer design may be constrained such that an RT-qPCR  
408 amplicon is nested within the dsRNA region. To design intron-spanning primers for short,  
409 efficient amplicon sizes [28, 29], while also avoiding conserved coding sequence regions that  
410 could cause off-target effects [15, 20], both RT-qPCR and dsRNA primers may target the  
411 same region. Small genes with few introns are particularly constrained, such as *Tc-zen1* (Fig  
412 1A: Fragment 3 with respect to the short dsRNA that avoids the homeobox, as in [20]).  
413 Secondly, for efficient screening of both expression and function, a single longer amplicon  
414 may serve as template for both *in situ* hybridization, where probe sensitivity correlates with  
415 sequence length [50], and for RNAi, where longer dsRNA is more effective [10]: this is the  
416 case with the long dsRNA for *Tc-zen1* examined here (Fig 1A, [25]).

417

418 We find that nested amplicons underestimate true knockdown strength by 5-20%  
419 compared to measurements with semi-nested amplicons that only detect endogenous  
420 transcript (Figs. 1B, 2A-B). Yet in previous work we consistently obtained strong  
421 knockdown validation with a nested amplicon, to 10% of wild type levels ([20]: Fragment 3  
422 and the short dsRNA, Fig. 1A). A key factor was tight developmental staging that targeted  
423 peak endogenous expression. Broad sampling beyond the peak expression window  
424 effectively dilutes the detection of wild type endogenous transcript levels as the baseline  
425 against which RNAi samples are compared. This can substantially alter calculations of  
426 knockdown efficiency (Fig. 6), whether using nested or semi-nested amplicons. Thus, staging  
427 precision is critical for accurate detection of knockdown efficiency, and this can largely  
428 overcome the underestimation effect of using a nested amplicon.

429

430 Measured expression levels are also affected by sequence-specific features. We most  
431 strongly detected dsRNA for medial regions of the *Tc-zen1* molecule, with a five-fold  
432 decrease towards the 3' and 5' ends (Fig. 1C). We therefore speculated that a dsRNA  
433 degradation mechanism may lead to progressive loss of detection from both termini.  
434 However, a 5' terminal amplicon detected stable dsRNA levels throughout embryogenesis  
435 (Fig. 1B: latter three stages with Fragment 2), arguing for alternative explanations. On further  
436 scrutiny, we find that minor differences in amplicon length strongly negatively correlate with  
437 amplification efficiency (Fig. S2, [29]). Also, despite primer specificity, we cannot exclude  
438 the possibility that our medial amplicon (Fragment 4) may weakly detect the homeobox of the  
439 closely related paralogue *Tc-zen2* [20, 51].

440

441 Overall, it is striking that long dsRNA is stable *in vivo* in insect eggs, and our nested  
amplicon strategy offers new opportunities for dsRNA quantification and long-term tracking.

442  
443  
444  
445  
446  
447  
448  
449  
450  
451  
452  
453  
454  
455  
456  
457  
458  
459  
460  
461  
462  
463  
464  
465  
466  
467  
468  
469  
470  
471  
472  
473  
474  
475  
476  
477  
478  
479  
480  
481  
482  
483  
484  
485  
486  
487  
488  
489  
490

### **pRNAi application in relation to knockdown persistence and female fecundity**

While confirming that pRNAi wanes within individual females (Fig. 3, [1, 3, 36]), unexpectedly we find that this only occurs after strong knockdown for nearly nine weeks – far longer than was previously shown or assumed. Early research in *Tribolium* reported substantial waning by three weeks after injection and complete cessation of knockdown by five weeks [1]. Accordingly, developmental genetics research generally examines eggs in the first 4-20 days after injection (*e.g.*, [25, 36, 52]), although  $\geq 90\%$  phenotype penetrance for up to 4.5 weeks has been shown [11]. Differing knockdown durations may reflect differences in injection age (pupal or adult), gene-specific RNAi efficiency [20, 36], and strain-specific rates of waning (Fig. 3D). More generally, our results demonstrate the potential for high-efficiency, persistent pRNAi-mediated knockdown, even after a single instance of dsRNA delivery.

It is also surprising that after 50 days there was an abrupt increase in fecundity in both beetle strains used in this study (Fig. 3F). It was in this time window of intermediate female age (50-100 days) that we obtained fecundity levels comparable to previous reports, which examined the first two months in a third strain (San Bernardino strain: [1, 53]).

These observations highlight within-species variation in the onset and duration of peak fecundity and the rate of RNAi waning. Extrapolation from our study under laboratory conditions (at 30 °C) could also imply longer durations of peak fecundity in natural environments, for slower life cycles at cooler ambient temperatures [*e.g.*, 54]. These factors should be taken into account when planning seasonal management of agricultural pest species by RNAi [5, 6].

### **Genomic loss and ambiguous homology of SID-1 emphasizes its minimal relevance for RNAi outside of nematodes**

The SID-1 channel protein has been part of the standard repertoire of RNAi-associated cellular machinery in surveys of transcriptomes and genomes (*e.g.*, [7, 12, 41, 46]). However, our metazoan-wide appraisal confirms multiple lineage-specific losses of SIL from arthropod genomes (Figs. 4-5) and that this protein family encompasses homology across SID-1 and TAG-130/CHUP-1 proteins (Figs. 5, S1). This strengthens a cumulative body of evidence in insects for ambiguous homology and limited functional relevance of SIL for RNAi [4, 5, 12, 42, 46].

The loss of SIL proteins is far more pervasive than previously recognized. Among the chelicerates, its absence in the Acari (mites and ticks) contrasts with retention in spiders and scorpions (Fig. 4, [47]). Its absence in flies [12, 41] may reflect ancestral genomic loss in the wider lineage Antliophora (Diptera, Mecoptera, and Siphonaptera, [46]). For other lineages, reports on single or few species noted anecdotal absences, including in the Heteroptera [7, 42, 46]. A recent review of RNAi specifically in the Hemiptera thus only reported general conservation of SID-1/SIL proteins in this order [6], without recognizing its wholesale absence in the true bugs (Figs. 4-5). Species sampling to date also supports SIL loss in the Trichoptera (Fig. 4 and [46]: 3 species), which may be further borne out as insect genomic resources continue to grow.

491 Multiple SIL losses in arthropods may seem surprising compared to its vertebrate-  
492 wide retention and the fact that nematodes and arthropods are more closely related as fellow  
493 Ecdysozoa (Fig. 4). This could suggest a higher rate of evolutionary divergence in arthropods  
494 against a backdrop of bilaterian-wide conservation. In fact, vertebrate protein homology  
495 suffers from the same ambiguities as analyses with arthropod proteins (Fig. S1). Vertebrate  
496 Sidt proteins show greater sequence similarity in certain functional motifs with TAG-  
497 130/CHUP-1 proteins, recognized for their role in cholesterol uptake [55]. Furthermore,  
498 recent cell culture work suggests that prior evidence for dsRNA uptake by Sidt/CHUP-1 may  
499 have detected a secondary consequence of dsRNA association with imported cholesterol [56],  
500 calling Sidt molecular function into question. Overall, this is conceptually similar to the  
501 macroevolutionary “functional lability” and repeated lineage-specific loss of RNA-dependent  
502 RNA polymerases (RdRPs, [57]), another component of systemic RNAi in some species (see  
503 below).

504  
505 In *C. elegans*, SID-1 is required for the systemic spread of RNAi within somatic  
506 tissues and the pRNAi effect in offspring [41]. Yet, despite the absence of any SID-1/SIL  
507 protein, the Heteroptera are highly sensitive to RNAi (reviewed in [58]). Knockdown is  
508 effective and systemic within the bodies of individual heteropteran nymphs [59]. pRNAi can  
509 achieve complete phenotypic knockdown in >95% of progeny for at least three weeks [60].  
510

511 Thus, just like other nematode SID proteins [4, 5, 43], SID-1 should be retired from  
512 general inclusion among the insect RNAi repertoire.

513  
514

### 515 **The power of orthology clustering, in context**

516 As discussed, some of our key insights into the taxonomic distribution of SID-1 were already  
517 documented on an anecdotal level in a range of published studies, but they had not been  
518 integrated. We show that metazoan-wide orthology clustering [45] combined with  
519 taxonomically-informed visualization (Fig. 4) can reveal previously unappreciated  
520 macroevolutionary patterns of protein origin, conservation, duplication, and loss across  
521 disparate lineages such as insects and vertebrates. With corroboration from additional lines of  
522 evidence including protein member curation, genome searches, phylogenetics, and literature  
523 surveys (Fig. 5), this is a powerful approach.

524

525 Such rapid phylogenomic profiling (Fig. 4) could be widely applied to whole suites of  
526 proteins, providing criteria for candidate gene selection alongside standard gene ontology  
527 (GO) features such as molecular function (transmembrane receptor) or biological process  
528 (receptor-mediated endocytosis). And, while our focus is the insects in general, visualization  
529 can be customized for other taxa of interest (*e.g.*, Vertebrata, Hymenoptera), particularly as  
530 the number and diversity of sequenced genomes increases.

531

532 Orthology clustering across distantly related species requires care. Whereas wholesale  
533 loss or duplication in a clade is convincing, taxonomically scattered copy number changes  
534 may reflect genuine evolutionary change in undersampled lineages or limitations in individual  
535 species’ data quality. Manual curation is necessary to eliminate redundant isoforms, which  
536 inflate copy number (Fig. 5A), and incomplete or suspiciously large and divergent proteins,  
537 which often reflect inaccurate gene model annotation [48, 49] and can skew phylogenetic  
538 analysis (see Methods). Secondly, each taxonomic level of orthology clustering is an  
539 independent analysis. At wider taxonomic levels, groups of single-copy orthologues often  
540 gain divergent within-species homologues and appear multi-copy due to greater sequence

541 divergence between homologues in distantly related species. The inclusion of divergent  
542 vertebrate Vldlr proteins within the metazoan-level orthology group for VgR exemplifies this  
543 (Fig. 4). The challenge of reconciling clustering analyses across taxonomic levels is a known,  
544 but perhaps not widely appreciated, issue [61]. Clarification of orthology is possible by  
545 prioritizing taxonomically restricted clustering results and then progressively adding wider  
546 taxa (*e.g.*, from Insecta to Metazoa, Fig. 4), supported by phylogenetic analysis (Fig. 5).  
547 However, the SID-1 and TAG-130/CHUP-1 proteins are particularly recalcitrant, forming a  
548 single orthology group even within the Nematoda alone.

549

550

### 551 **How can pRNAi persistence be reconciled with dsRNA cellular processing and maternal** 552 **transmission?**

553 Our unexpected finding that the long dsRNA molecule is maternally transmitted into eggs,  
554 thereby depleting maternal dsRNA levels, is difficult to reconcile with pRNAi persistence for  
555 months (Figs. 1-3). We also find limitations in attributing dsRNA cellular transmission to  
556 specific import proteins (Figs. 4-5). Furthermore, biochemical, physiological, and cellular  
557 studies on dsRNA processing highlight where dsRNA is *not* located, rather than how it is  
558 delivered to Dicer to trigger RNAi. To conclude, we discuss how our observations fit into the  
559 wider framework of outstanding major questions on systemic parental RNAi insects (Fig. 7).

560

561 Upon injection into the female's body cavity (Fig. 7A), dsRNA spreads throughout the  
562 circulatory system. However, it rapidly clears – on the scale of minutes to hours – from the  
563 hemolymph due to cellular uptake and degradation (Fig. 7B, [21, 23, 62]). In *Tribolium*,  
564 substantial activity of endogenous dsRNases is documented in the gut and implicated in the  
565 hemolymph [63]. Also, the ovary represents just one organ in the female body in which  
566 dsRNA uptake occurs. In effect, the germline competes with other cell types for dsRNA.  
567 Particularly when it is distal to the site of dsRNA injection, it may be less sensitive or even  
568 refractory to RNAi [9, 23]. Injection of dsRNA for pRNAi is highly effective in practice, but  
569 not without limitations.

570

571 Second, the dsRNA received by the insect ovary represents a non-renewable resource.  
572 In this and other studies, pRNAi is achieved after a single injection, providing a finite number  
573 of dsRNA molecules. That starting pool is amplified by RdRPs in plants, nematodes, and  
574 possibly fungi [57, 64-66]. This property can be exploited *in planta* for sustained delivery of  
575 non-endogenous transcripts in RNAi-based pest control [64]. However, there is no evidence  
576 to date for dsRNA amplification in insects (reviewed in [57, 63]). Also, amplification in other  
577 species generally or exclusively involves siRNA synthesis [64-66], which contrasts with our  
578 detection of  $\geq 100$ -bp RT-qPCR amplicons spanning full-length long dsRNAs (Figs. 1-2).

579

580 Next, there are uncertainties as to how cellular uptake of long dsRNA is accomplished  
581 (Fig. 7C). In principle dsRNA could be shuttled into the oocyte after uptake by the nurse  
582 cells or the follicular epithelium, or it could be directly imported by the oocyte during  
583 patency, when intercellular openings in the follicular epithelium confer direct access to the  
584 hemolymph. However, neither SID-1 for cellular uptake (discussed above) nor VgR for  
585 oocyte endocytosis seems to be the effector. In *C. elegans*, co-accumulation of dsRNA and  
586 vitellogenin in oocytes suggested a common import mechanism for these molecules [22].  
587 However, the VgR receptor is hexapod-specific (Figs. 4-5), arguing against a conserved  
588 mechanism associated with invertebrate vitellogenin transport. Furthermore, trials with  
589 labeled dsRNA revealed its exclusion from oocytes during vitellogenesis [23]. On the other  
590 hand, SID-1 and VgR are two candidates among many potential receptor proteins. Clathrin-

591 dependent endocytosis is required for within-individual larval RNAi in *Tribolium* [24], and  
592 such mechanisms may also be applicable for pRNAi.

593

594 More generally, endocytosis has long been recognized as a potential mechanism for  
595 dsRNA uptake, but it has its own cellular challenges (Fig. 7D, reviewed in [4, 5, 42]). First, if  
596 dsRNA is sequestered within an endosome, it is inaccessible for processing by Dicer in the  
597 cytosol, and the mechanism of selective endosomal escape of dsRNA is unknown. Species-  
598 specific levels of dsRNA sequestration have been correlated with susceptibility to RNAi [5].  
599 Second, endosome maturation culminates in fusion with a lysosome, targeting all contents for  
600 degradation [4]. Thus, endosomes do not seem suitable as long-term, slow-release reservoirs  
601 for pRNAi. Beetles including *Tribolium* appear to have low levels of endosomal  
602 sequestration, but those studies were performed in larvae [reviewed in 5]. Further  
603 investigation of maternal reproductive tissues may reveal alternative, germline-specific  
604 mechanisms of dsRNA retention and cell-to-cell transmission. This would be fully consistent  
605 with the growing body of evidence for the tissue-specific as well as stage-specific nature of  
606 RNAi (*e.g.*, discussed in [9, 23, 67]).

607

608 Finally, dsRNA's journey from maternal injection through successful embryonic  
609 knockdown requires two levels of maternal transmission (Fig. 7E). After dsRNA is delivered  
610 into the oocyte, cellular uptake must happen again: when dsRNA within the yolky oocyte is  
611 taken up by the embryonic cells, where knockdown is finally achieved. As maternal injection  
612 can lead to deposition of labeled oligonucleotides in the yolk without embryonic uptake [68],  
613 this step also cannot be taken for granted. In summary, while we continue to successfully use  
614 pRNAi for developmental genetics research and in devising new and improved strategies for  
615 pest management, there remain many aspects of dsRNA transport and systemic propagation  
616 that await explanation.

617

## 618 MATERIALS AND METHODS

619

### 620 *Tribolium castaneum* (Herbst) stocks and genomic resources

621 All beetle stocks were kept under standard culturing conditions [13] at 30°C, 50 ± 10% RH.  
622 The lines used for the RT-qPCR assays were San Bernardino (SB) wild type [13] and nuclear  
623 GFP (nGFP) [33]. For the RNAi penetrance time course experiments, Strain 1 was a  
624 heterozygous cross of the enhancer trap lines G04609 (females; [35]) and HC079 (males;  
625 [30]), both in the *pearl* white-eyed mutant background [69]; Strain 2 was the LifeAct-GFP  
626 line, in a rescued *vermillion white* background [70].

627

628 Sequence data for the target genes in this study are based on the latest genome  
629 assembly and official gene set (OGS3, [71]): *Tc-zen1* (TC000921, [20, 26]), *Tc-chitin*  
630 *synthase 1* (*Tc-chs1*, TC014634, [27]), *Tc-Ribosomal protein S3* (*Tc-RpS3*, TC008261, [25]),  
631 *Tc-germ cell-less* (*Tc-gcl*, TC001571, [39]), and *Tc-tailup* (*Tc-tup*, TC033536, [15, 37]).  
632 Details of primers and amplicon sizes are presented in Table S1, also for the transgene  
633 *DsRed2* (based on the *piggyBac* mutator construct: GenBank accession EU257621.1).

634

### 635 Parental RNAi

636 Parental RNAi was performed as described [25], with dsRNA resuspended in H<sub>2</sub>O and  
637 injected at a concentration of approximately 1 µg/µl (range: 900-1100 ng/µl). Beetles were  
638 sexed as pupae (distinguished by genital morphology) and allowed to mature to adulthood.  
639 Females were anesthetized on ice and dsRNA was injected into the abdomen. Uninjected  
640 females served as wild type controls. Gene-specific knockdown phenotypes were confirmed  
641 based on published resources for all genes, using the specific assays described below for each  
642 of the RT-qPCR and time course experiments. As *Tc-tup* has thus far only been characterized  
643 in a high throughput screening analysis [15, 37], we used two non-overlapping fragments  
644 (NOFs) of dsRNA in our experiments (NOF1 for Experiments 1 and 2, NOF2 for Experiment  
645 3: see Table S1). We found no quantitative or qualitative phenotypic difference between the  
646 non-overlapping fragments.

647

### 648 RT-qPCR experiments

649 Embryos were collected over a period of 20 days after injection. Knockdown efficiency was  
650 ensured by: manual assessment of serosal cuticle structure (eggshell rigidity) for *Tc-zen1* [11,  
651 20] and *Tc-chs1* [27], detection of fluorescent signal for *dsRed* [34, 35], and by RT-qPCR for  
652 all genes. To evaluate *DsRed* knockdown efficiency by fluorescence screening, only larvae  
653 were scored to ensure all offspring had successfully completed embryogenesis and were thus  
654 old enough to produce strong 3xP3-DsRed signal.

655

656 RT-qPCR and data analysis were performed as described, including TRIzol extraction,  
657 DNase treatment and gDNA quality control checks, cDNA synthesis, and Fast SYBR Green  
658 detection on an Applied Biosystems 7500 Fast cycler (reagents: ThermoFisher Scientific;  
659 TURBO DNAfree Kit, Applied Biosystems; SuperScript VILO cDNA Synthesis Kit,  
660 Invitrogen; Life Technologies; respectively) [20, 25]. All samples were run in triplicates  
661 (technical replicates) with three samples per treatment (biological replicates). *Tc-RpS3* was  
662 used as the reference gene, this being established as more stable across embryogenesis as a  
663 single reference gene compared to several alternatives with pairs of reference genes or seven  
664 other single genes [25]. Raw data were analyzed using LinRegPCR v12.16 [72, 73] and the  
665 expression ratio (R) was calculated using the  $\Delta\Delta C_t$  method, according to the formula:

$$R = \frac{(E_{\text{target}})^{\Delta\text{CP}_{\text{target}}(\text{control} - \text{sample})}}{(E_{\text{ref}})^{\Delta\text{CP}_{\text{ref}}(\text{control} - \text{sample})}}$$

666  
667  
668  
669  
670  
671  
672  
673  
674

where E is the mean efficiency of the corresponding amplicon as calculated by LinReg and CP is the mean CP of the three technical replicates (after passing quality control in LinReg). The control sample was a pool of all samples (wild type and RNAi; all time points; all biological replicates) of the respective experiment (*i.e.*, RNAi knockdown of a given gene: *Tc-zen1*, *Tc-chs1*, or *dsRed*). The % of wild type (WT) was calculated by dividing  $R_{\text{RNAi}}$  by  $R_{\text{WT}}$  for the same time point and sample collection date, where both R values are relative to the control sample.

### 675 RNAi penetrance time course experiments

676 Larval cuticle preparations were used to monitor phenotype penetrance over time after a  
677 single injection of dsRNA into the adult female. A cuticle assay is highly effective even with  
678 limited embryonic material, which was important in our months-long experiments because  
679 female survival and fecundity decline over time [74]. Moreover, *Tc-tup* and *Tc-gcl* provide  
680 clear cuticle readouts, whereas RNAi for each of our RT-qPCR target genes can result in non-  
681 lethal knockdown that must be analyzed at specific developmental stages (Fig. 2C-F, [27]

682

683 Eggs were collected at regular intervals and maintained under standard culturing  
684 conditions until a minimum age of  $\geq 4$  days after egg lay, to ensure time for larvae to hatch.  
685 Larval cuticles were then prepared as described previously [15]. Briefly, eggs and larvae  
686 were dechorionated in bleach (VWR # L14709.0F, sodium hypochlorite (11-14%  $\text{Cl}_2$ ) in  
687 aqueous solution), rinsed in tap water, and mounted on slides in 1:1 lactic acid:Hoyer's  
688 solution [75]. Slides were cured overnight at 60 °C to fully clear soft tissues. Slides were  
689 then scored under incidental white light on stereomicroscopes, distinguishing six categories:  
690 wild type larvae, unhatched wild type (post dorsal closure with no apparent defects, but still at  
691 least partially within the vitelline membrane), gene-specific phenotype category 1 (generally a  
692 larger body size), gene-specific phenotype category 2 (generally a smaller and less well  
693 formed body), non-specific defects, or no larval cuticular material ("empty egg", indicative of  
694 unfertilized eggs or early embryonic lethality). Statistics on penetrance compare wild type  
695 with gene-specific knockdown, combining each of the first two categories while for simplicity  
696 omitting the latter two, minor categories. The time point of a sample represents the start of  
697 the egg collection period (*e.g.*, data at 3 dpi represent the sample collected 3-4 dpi in  
698 Experiment 1, Fig. 3D). Egg collection intervals were extended or pooled to ensure sample  
699 sizes of  $\geq 10$  offspring per treatment condition for each time point.

700

701 Experiments were conducted until three egg collections contained only hatched larvae  
702 and the knockdown effect was deemed to have fully waned. Throughout the experiments,  
703 dead adult beetles were periodically removed and sexed to note female-specific lethality  
704 (males have a darkened cuticular sex patch on the inner/proximal side of the first leg pair;  
705 this is absent in females: [https://www.ars.usda.gov/plains-](https://www.ars.usda.gov/plains-area/mhk/cgahr/spieru/docs/tribolium-stock-maintenance/#sexing)  
706 [area/mhk/cgahr/spieru/docs/tribolium-stock-maintenance/#sexing](https://www.ars.usda.gov/plains-area/mhk/cgahr/spieru/docs/tribolium-stock-maintenance/#sexing) [last accessed 15 October  
707 2021]).

708

709 To assay females of different ages, adult beetles were maintained continuously under  
710 standard culturing conditions at 30 °C until injection. Female age was calculated from the last

711 date when beetles in the experimental cohort were sexed as pupae, reflecting a minor  
712 overestimation ( $\leq 5$  days) relative to eclosion of the adult for some individuals in the cohort.  
713 The females used in Experiments 1 and 2 derive from the same cohort and were sexed at the  
714 same time.

### 715 716 **Microscopy**

717 Images were acquired on an epifluorescent microscope with structured illumination (Zeiss  
718 Axio Imager.Z2 with Apotome.2). Red fluorescence signal in the eyes and ventral nerve cord  
719 was used to evaluate *DsRed* RNAi, with green fluorescence from the ubiquitous nGFP signal  
720 in this transgenic line serving an internal control. Representative cuticle images were  
721 acquired with GFP acquisition settings to detect cuticle autofluorescence, presented as  
722 maximum intensity projections from the acquired z-stacks.

### 723 724 **Orthology distribution, BLAST, and phylogenetic evaluations**

725 We examined orthology groups in OrthoDB v. 10.1 [45], comparing the independent  
726 orthology clustering analyses at taxonomic levels including Metazoa, Arthropoda, Hexapoda,  
727 Insecta, Hemiptera, Coleoptera, Nematoda, and Vertebrata. We noted minor changes in  
728 species membership, copy number, and protein ID between the independent orthology  
729 clustering analyses conducted at the various taxonomic levels, which is a known issue for  
730 orthology clustering [discussed in 61]. In all cases, we used data at the most taxonomically  
731 restrictive level (last common ancestor, LCA, level) as the most specific and reliable. For the  
732 genes examined here (Fig. 4), orthology clustering was very robust, with only minor  
733 differences (*e.g.*, Fig. 4: asterisk and legend note for VgR).

734  
735 Curation of protein sequences obtained from orthology groups involved visual  
736 inspection of the protein size and sequence in order to remove partial and redundant isoforms.  
737 In choosing appropriate protein members of an orthology group for use in phylogenetic  
738 analyses, visual inspection of multiple sequence alignments and preliminary trees were used  
739 to identify and cull divergent (long branch) proteins and overly long proteins (which may  
740 reflect erroneous protein fusion or other model annotation errors such as inclusion of  
741 extraneous predicted exons).

742  
743 Protein sequences were aligned for manual inspection in ClustalW [76], at  
744 <https://www.genome.jp/tools-bin/clustalw> [last accessed 15 October 2021]. Phylogenies were  
745 generated at Phylogeny.fr with default settings (alignment with MUSCLE 3.8.31, phylogeny  
746 with PhyML 3.1/3.0 aLRT, and tree rendering with TreeDyn 198.3) [77].

747  
748 Genome assemblies were examined by BLAST, supported by visual inspection of hits  
749 with respect to the assembly, gene model predictions, and expression evidence tracks in the  
750 Apollo genome browsers, hosted at the i5K@NAL workspace [78]. Species sampling  
751 involved a particular focus on the Heteroptera [48, 79-82] and selected species from other  
752 orders (Thysanoptera, [83]; Hymenoptera, [84]; Coleoptera, [85, 86]). The genome assembly  
753 versions interrogated by tBLASTn are detailed in Table S2.

754



755 **FIGURE LEGENDS**

756

757 **Figure 1. Long dsRNA molecules are transmitted maternally and persist throughout**  
758 **embryogenesis after parental RNAi for *Tc-zen1*.**

759 (A) Structure of *Tc-zen1* mRNA (CDS: solid black, UTRs: grey, homeobox: open box) and  
760 corresponding dsRNA fragments (green) used to silence the gene: the long dsRNA (solid  
761 green) was used in this study; the short dsRNA (dashed green) was used previously [20] to  
762 specifically avoid the highly conserved homeobox. Beneath, the six fragments (Fr. 1-6)  
763 indicate the regions used for RT-qPCR quantification, where the two outermost fragments  
764 (blue) lay partially outside of the dsRNA fragment and four fragments (red) lay inside the  
765 dsRNA fragment. Fragment lengths are indicated and are shown to scale.

766 (B) Expression ratio of *Tc-zen1* in knockdown (RNAi) and wild type (WT) samples at  
767 different stages of development, assayed by RT-qPCR with fragments that extend outside (Fr.  
768 1) or are nested within (Fr. 2) the dsRNA fragment, as indicated in the legend. In the three  
769 older stages, Fragment 2 in the RNAi samples (yellow) shows consistently higher expression  
770 than all other samples, due to its ability to detect the dsRNA in addition to endogenous  
771 transcript. Developmental time is specified in hours after egg lay (*i.e.*, after fertilization).

772 (C) *Tc-zen1* expression measured by RT-qPCR in the RNAi samples compared to WT  
773 samples for all fragments, at a developmental stage when endogenous mRNA levels are  
774 negligible (at 16-24 h). The two outermost fragments (1 and 6) show reduced expression  
775 compared to WT, consistent with successful RNAi knockdown, while the inner fragments (2-  
776 5) show increased expression after RNAi, with highest overexpression for Fragment 4 (see  
777 also Fig. S2). The mean values (%) for each fragment are indicated.

778 Mean expression levels are shown from three biological replicates (see Methods); error bars  
779 represent  $\pm$  one standard deviation.

780

781 **Figure 2. Maternal transmission of dsRNA occurs for diverse genes with distinct**  
782 **expression profiles.**

783 (A-B) RT-qPCR expression ratio assayed with amplicons that are nested (“in”: red and  
784 yellow) or partially outside (“out”: light and dark blue) with respect to the dsRNA fragment,  
785 in WT and after RNAi, as indicated in the legends. Mean expression levels are shown from  
786 three biological replicates; error bars represent  $\pm$  one standard deviation. For *Tc-chs1* (A), the  
787 nested qPCR amplicon shows higher expression in RNAi samples (yellow) when endogenous  
788 *Tc-chs1* expression is low (48-56 h). Similarly, in the nGFP strain expressing transgenic  
789 dsRed (B), the *DsRed* nested qPCR amplicon detects a relative overexpression after RNAi at  
790 a stage when *DsRed* transgene is not expressed (8-24 h). Inset schematics depict the  
791 transcript, dsRNA, and qPCR fragments to scale, using the same color scheme as in Fig. 1;  
792 only the first 700 bp of the 5092-bp mRNA is shown for *Tc-chs1*.

793 (C-F) Phenotypic confirmation of *DsRed* knockdown through loss of DsRed fluorescence in a  
794 transgenic line that ubiquitously expresses nuclear-localized GFP (green). The 3xP3 core  
795 promoter drives DsRed signal (magenta) in the brain and ventral nerve cord of untreated  
796 control (WT) embryos (C) and larvae (E). After *DsRed* RNAi, 3xP3-driven DsRed signal is  
797 absent, with only weak autofluorescence detected in the epidermal cuticle and the yolk (D, F).  
798 Views are lateral (C-D) or dorsal (E-F), with anterior left and, as applicable, dorsal up.  
799 Landmark thoracic (T) and abdominal (A) segments are numbered. Letter-prime panels show  
800 the DsRed channel alone. Scale bars are 100  $\mu$ m. Horizontal bar charts show the proportions  
801 of larvae with no (black), weak (yellow), or strong (magenta) DsRed signal in larvae.

802

803

804 **Figure 3. Systemic parental RNAi persists at high levels for months before fully waning.**  
805 **(A-C)** Representative larval cuticle preparations for wild type (WT), *Tc-tup<sup>RNAi</sup>*, and *Tc-*  
806 *gcl<sup>RNAi</sup>* (from Experiment 3, collected 39-52 dpi, assayed  $\geq 6$  days after egg lay).  
807 Views are lateral (A,B) or dorsal-lateral (C), with anterior left and dorsal up. Landmark  
808 thoracic (T) and abdominal (A) segments are numbered. The dashed line indicates the plane  
809 of symmetry in the *Tc-gcl<sup>RNAi</sup>* mirror-image double abdomen phenotype; brackets outline the  
810 terminal urogomphi. Scale bars are 100  $\mu\text{m}$ .  
811 **(D)** Time courses of parental RNAi penetrance from experiments that differ in beetle strain,  
812 female age, and target gene for knockdown (see figure legend and Methods). Data points  
813 represent minimum age after injection, with  $n \geq 10$  eggs in each sample (see Methods). Shaded  
814 plot segments for Experiments 2 and 3b represent time intervals with dynamic changes in  
815 RNAi penetrance that encompass both transient fluctuations (increase or decrease) and the  
816 interval of RNAi waning, while female population size was constant (no fatalities).  
817 **(E)** Survival curves for females from all treatment conditions from all three experiments. For  
818 Experiments 2 and 3b, respectively, the red and orange shading corresponds to the same  
819 intervals as in (A).  
820 **(F)** Fecundity values (number of eggs per female per day) relative to female age from all  
821 treatment conditions in all experiments, assayed at 19-26 time points per treatment.  
822 **(G-H)** Juxtaposition of phenotype penetrance (%; left y-axis) with female population size and  
823 fecundity values (integer values, right y-axis) for the period of RNAi waning in Experiments  
824 2 and 3b (red and orange shaded intervals, as above): female population size and fecundity  
825 remain steady or exhibit only minor fluctuation while RNAi wanes.

826  
827 **Fig. 4. Visualization of metazoan orthology clustering reveals macroevolutionary**  
828 **patterns of protein conservation and lineage-specific losses.**  
829 Taxonomic distribution and copy number of the SID-1/SIL and VgR transmembrane receptor  
830 proteins, representing all metazoan animal species in OrthoDB v10.1, with species numbers  
831 stated parenthetically. Phylogenetic relationships are based on [87, 88]. Protein distributions  
832 are shown with one box per species, ordered sequentially by copy number, with the color  
833 code indicated in the legend for each gene. Notable lineage-specific absences are indicated in  
834 bold grey text. For one mite species (Acari), a VgR protein was only included in the wider  
835 metazoan orthology group, but this species did not have a VgR protein based on orthology  
836 clustering of Arthropoda only (magenta with white asterisk). No other presence/absence  
837 results differed across the Insecta, Hexapoda, Arthropoda, and Metazoa clustering analyses.  
838 For minor changes in copy number across clustering analyses, the value reported here is based  
839 on the most taxonomically restricted analysis (see Methods). Hexapoda taxonomic  
840 abbreviations and species counts: Hex.: Non-insect Hexapoda (4), Palaeoptera (3),  
841 Polyneoptera (4), Non-hemipteran Paraneoptera (2); Hem.: Hemiptera (16); Hym.:  
842 Hymenoptera (40); Col.: Coleoptera (9); Lep.: Lepidoptera (16); Oth.: other Holometabola:  
843 Strepsiptera (1), Trichoptera (1). Vertebrate SID-1 proteins are mostly multi-copy, with  
844 single orthologues in ray-finned fishes (Actinopterygii), some orders of birds  
845 (Pelecaniformes, Gruiformes), and the platypus.

846  
847 **Figure 5. Curation, BLAST, and phylogenetics confirm and refine orthology clustering**  
848 **assessments of SID-1 and VgR distributions.**  
849 **(A)** Detailed evaluation of genomic resources for Hemiptera and selected outgroups supports  
850 the lineage-specific loss of SID-1 in the Heteroptera: species in blue text lack SID-1. Data  
851 types and sources are indicated in the legend, including recent transcriptomes ( $\wedge$ : [46];  $\#$ : [7]),  
852 genome assemblies ( $^{i5K}$ : [78]), and OGS collections at OrthoDB ( $*$ : [45]). Phylogenetic  
853 relationships after [88-90]. For two species (*Nilaparvata lugens* and *Anoplophora*

854 *glabripennis*), follow-up curation (“C”) reduced SID-1 copy number compared to the  
855 OrthoDB assessment, as indicated (see Methods).  
856 **(B)** Selected subset of 14 species from (A) that were further interrogated by direct tBLASTn  
857 searching of the genome assembly. Each of the three orthologous query proteins from *A.*  
858 *pisum*, *T. castaneum* (SirA), and *Danio rerio* produced identical outcomes for copy number.  
859 **(C-D)** Maximum likelihood whole-protein phylogenies of SID-1 homologues based on 35  
860 proteins from 23 species (C) and VgR/Vldlr homologues based on 50 proteins from 50  
861 species (D). The branch length unit representing substitutions per site. All nodes have  $\geq 50\%$   
862 support (enlarged labels for selected nodes). Shaded boxes indicate clades of interest, as  
863 labeled in the figure, with dashed colored lines for paraphyletic protein members. For the  
864 VgR/Vldlr tree, the protein marked with an asterisk (\*) represents the chelicerate species that  
865 was only included in the Metazoa, but not the Arthropoda, orthology clustering analysis (see  
866 Fig. 4).

867  
868

869 **Figure 6. Tighter developmental staging mitigates underestimation of RNAi knockdown**  
870 **when assayed with a nested qPCR amplicon.**

871 This schematized representation based on empirical data for *Tc-zen1* illustrates how the time  
872 window assayed by RT-qPCR compares to the time course of endogenous expression [20],  
873 and in turn how this affects the apparent efficiency of RNAi knockdown. Even with a nested  
874 amplicon, assays that strictly target the time window of peak endogenous expression confirm  
875 strong knockdown to 10% of wild type levels (blue: based on use of Fragment 3 depicted in  
876 Fig. 1A, [20]). In contrast, broad sampling that includes periods of low endogenous  
877 expression are more susceptible to underestimation of knockdown (calculated as 25% of wild  
878 type levels), due to unmasked detection of dsRNA with a nested amplicon (orange: based on  
879 Fragment 2, data in Fig. 1B). Equally, for *Tc-chs1* we obtained two-fold variation in  
880 calculated knockdown level from different developmental stages of the same experiment, with  
881 either nested or semi-nested amplicons (Fig. 2A).

882

883 **Figure 7. Unresolved features of systemic parental RNAi.**

884 Where is the dsRNA stored long-term in the mother without degradation and with continuous  
885 transmission to eggs? Cartoons represent the progression of dsRNA from initial injection (A),  
886 through the mother’s tissues (B) and cells (C,D), to the oocytes (E). Presence of dsRNA is  
887 represented in blue, with specific cell- and tissue-scale challenges to its transmission shown in  
888 red, and with final waning of pRNAi indicated by pale blue and grey. Clip art images  
889 reproduced and modified from Microsoft PowerPoint 2021, v. 16.52.; ovary silhouette based  
890 on image at [https://cronodon.com/BioTech/Insect\\_Reproduction.html](https://cronodon.com/BioTech/Insect_Reproduction.html).

891

892

893 **SUPPLEMENTARY FILES**

894

895 **Figure S1. Additional phylogenies with species subsampling for SID-1/SIL proteins.**

896 (A-D) Maximum likelihood phylogenies of selected SID-1 homologues. The branch length  
897 unit representing substitutions per site. All nodes have  $\geq 50\%$  support. The designation  
898 “jumbled” highlights clades that conflate distinct genes (nematode SID-1 with TAG-  
899 130/CHUP-1, vertebrate Sidt1 with Sidt2), which did not occur across all trees.

900

901 **Figure S2. Negative correlation of nested RT-qPCR amplicon length and detection of**  
902 **dsRNA (expression in excess of WT), assayed for *Tc-zen1* at 16-24 h, as in main text Figure**

903 1C. Fragments 3 and 4 are shorter than Fragments 2 and 5. Logarithmic trendline for mean  
904 expression level (% WT) vs. amplicon length:  $R^2 = 0.76$ .

905

906 **Table S1. Primers used in this study.** Note that primers for RNAi (dsRNA synthesis) also  
907 included an adapter sequence, 5'-GGCCGCGG-3' (forward primers) or 5'-CCCGGGGC-3'  
908 (reverse primers), for subsequent amplification with T7 promoter universal primers (adapters  
909 not shown in table). The T7 universal primers are: 5'-universal primer 5'-  
910 GAGAATTCTAATACGACTCACTATAGGGCCGCGG-3', and 3'-universal primer 5'-  
911 AGGGATCCTAATACGACTCACTATAGGGCCCGGGGC-3'.

912

913 **Table S2. Genome assembly versions queried by BLAST.** These resources were  
914 interrogated with tBLASTn queries for selected SID-1 proteins (see main text Figure 5B).  
915 Accessed at the i5K@NAL site, most recent access date: 13 October 2021.

916

917

## 918 MANUSCRIPT INFORMATION

919

### 920 Acknowledgments

921 We thank Stefan Koelzer for generating and processing RNAi samples for RT-qPCR,  
922 Siegfried Roth for diverse discussions on insect pRNAi, Robert M. Waterhouse for assistance  
923 with and discussions on OrthoDB, Robert M. Waterhouse and Ruixun Wang for detailed and  
924 helpful scrutiny of the manuscript, and the Stancliffe Institute for Remote Working for  
925 infrastructural support. We also thank Sebastien Santini (CNRS/AMU IGS UMR7256) and  
926 the PACA Bioinfo platform (supported by IBISA) for the availability and management of the  
927 phylogeny.fr website used for our phylogenetic analyses. Finally, we thank Dominik Stappert  
928 for originally designing the long template primer pair for *Tc-zen1* during his doctoral work  
929 [74], as this has proven extraordinarily fruitful over the years.

930

931

### 932 Funding

933 This work was supported by funding from: the German Research Foundation (Deutsche  
934 Forschungsgemeinschaft), through Emmy Noether Program grant PA 2044/1-1; the  
935 University of Warwick, through a Warwick Institutional Research Support Fund award; and  
936 the Biotechnology and Biological Sciences Research Council (BBSRC UKRI), through grant  
937 BB/V002392/1, to KAP.

938

939

### 940 Author contributions

941 Conceptualization: TH, KAP; Conducted experiments and analyzed data: TH, KDN, KAP;  
942 Primary writing: TH, KAP; Discussion, review, and editing of the manuscript: TH, KDN,  
943 KAP.

944

945

### 946 ORCID

947 TH: 0000-0001-8181-939X

948 KDN: 0000-0003-2582-5589

949 KAP: 0000-0002-6417-251X

950

951

952

953 **REFERENCES**

- 954
- 955 1. Bucher, G., Scholten, J., and Klingler, M. (2002). Parental RNAi in *Tribolium*  
956 (Coleoptera). *Curr. Biol.* *12*, R85-R86.
- 957 2. Hughes, C.L., and Kaufman, T.C. (2000). RNAi analysis of *Deformed*, *proboscipedia*  
958 and *Sex combs reduced* in the milkweed bug *Oncopeltus fasciatus*: novel roles for Hox  
959 genes in the hemipteran head. *Development* *127*, 3683-3694.
- 960 3. Liu, P.Z., and Kaufman, T.C. (2004). *hunchback* is required for suppression of  
961 abdominal identity, and for proper germband growth and segmentation in the  
962 intermediate germband insect *Oncopeltus fasciatus*. *Development* *131*, 1515-1527.
- 963 4. Cooper, A.M., Silver, K., Zhang, J., Park, Y., and Zhu, K.Y. (2019). Molecular  
964 mechanisms influencing efficiency of RNA interference in insects. *Pest management*  
965 *science* *75*, 18-28.
- 966 5. Zhu, K.Y., and Palli, S.R. (2020). Mechanisms, applications, and challenges of insect  
967 RNA interference. *Annual Review of Entomology* *65*, 293-311.
- 968 6. Jain, R.G., Robinson, K.E., Asgari, S., and Mitter, N. (2021). Current scenario of  
969 RNAi-based hemipteran control. *Pest management science* *77*, 2188-2196.
- 970 7. Cagliari, D., Dias, N.P., Dos Santos, E., Rickes, L.N., Kremer, F.S., Farias, J.R., Lenz,  
971 G., Galdeano, D.M., Garcia, F.R.M., Smagghe, G., et al. (2020). First transcriptome of  
972 the Neotropical pest *Euschistus heros* (Hemiptera: Pentatomidae) with dissection of its  
973 siRNA machinery. *Scientific reports* *10*, 4856.
- 974 8. Yoon, J.S., Koo, J., George, S., and Palli, S.R. (2020). Evaluation of inhibitor of  
975 apoptosis genes as targets for RNAi-mediated control of insect pests. *Archives of*  
976 *insect biochemistry and physiology*, e21689.
- 977 9. Ye, C., Hu, X.S., Wang, Z.W., Wei, D., Smagghe, G., Christiaens, O., Niu, J., and  
978 Wang, J.J. (2021). Involvement of clathrin-dependent endocytosis in cellular dsRNA  
979 uptake in aphids. *Insect biochemistry and molecular biology* *132*, 103557.
- 980 10. Miller, S.C., Miyata, K., Brown, S.J., and Tomoyasu, Y. (2012). Dissecting systemic  
981 RNA interference in the red flour beetle *Tribolium castaneum*: parameters affecting  
982 the efficiency of RNAi. *PLoS One* *7*, e47431.
- 983 11. Panfilio, K.A., Oberhofer, G., and Roth, S. (2013). High plasticity in epithelial  
984 morphogenesis during insect dorsal closure. *Biol. Open* *2*, 1108-1118.
- 985 12. Tomoyasu, Y., Miller, S.C., Tomita, S., Schoppmeier, M., Grossmann, D., and  
986 Bucher, G. (2008). Exploring systemic RNA interference in insects: a genome-wide  
987 survey for RNAi genes in *Tribolium*. *Genome Biol.* *9*, R10.
- 988 13. Brown, S.J., Shippy, T.D., Miller, S., Bolognesi, R., Beeman, R.W., Lorenzen, M.D.,  
989 Bucher, G., Wimmer, E.A., and Klingler, M. (2009). The red flour beetle, *Tribolium*  
990 *castaneum* (Coleoptera): A model for studies of development and pest biology. *Cold*  
991 *Spring Harb. Protoc.* *2009*, pdb.emo126.
- 992 14. Bai, H., Zhu, F., Shah, K., and Palli, S.R. (2011). Large-scale RNAi screen of G  
993 protein-coupled receptors involved in larval growth, molting and metamorphosis in  
994 the red flour beetle. *BMC Genomics* *12*, 388.
- 995 15. Schmitt-Engel, C., Schultheis, D., Schwirz, J., Ströhlein, N., Troelenberg, N.,  
996 Majumdar, U., Dao, V.A., Grossmann, D., Richter, T., Tech, M., et al. (2015). The  
997 iBeetle large scale RNAi screen reveals novel gene functions for insect development  
998 and physiology. *Nat. Commun.* *6*, 7822.
- 999 16. Hakeemi, M.S., Ansari, S., Teuscher, M., Weißkopf, M., Großmann, D., Kessel, T.,  
1000 Dönitz, J., Siemanowski, J., Wan, X., Schultheis, D., et al. (2021). Large portion of  
1001 essential genes is missed by screening either fly or beetle indicating unexpected  
1002 diversity of insect gene function. *bioRxiv*, DOI: 10.1101/2021.02.03.429118.

- 1003 17. Oberhofer, G., Grossmann, D., Siemanowski, J.L., Beissbarth, T., and Bucher, G.  
1004 (2014). Wnt/ $\beta$ -catenin signaling integrates patterning and metabolism of the insect  
1005 growth zone. *Development* *141*, 4740-4750.
- 1006 18. Jacobs, C.G.C., Spaink, H.P., and van der Zee, M. (2014). The extraembryonic serosa  
1007 is a frontier epithelium providing the insect egg with a full-range innate immune  
1008 response. *eLife* *3*, e04111.
- 1009 19. Stappert, D., Frey, N., von Levetzow, C., and Roth, S. (2016). Genome-wide  
1010 identification of *Tribolium* dorsoventral patterning genes. *Development* *143*, 2443-  
1011 2454.
- 1012 20. Gurska, D., Vargas Jentsch, I.M., and Panfilio, K.A. (2020). Unexpected mutual  
1013 regulation underlies paralogue functional diversification and promotes epithelial tissue  
1014 maturation in *Tribolium*. *Commun. Biol.* *3*, 552.
- 1015 21. Wang, K., Peng, Y., Fu, W., Shen, Z., and Han, Z. (2019). Key factors determining  
1016 variations in RNA interference efficacy mediated by different double-stranded RNA  
1017 lengths in *Tribolium castaneum*. *Insect molecular biology* *28*, 235-245.
- 1018 22. Marré, J., Traver, E.C., and Jose, A.M. (2016). Extracellular RNA is transported from  
1019 one generation to the next in *Caenorhabditis elegans*. *Proceedings of the National*  
1020 *Academy of Sciences of the United States of America* *113*, 12496-12501.
- 1021 23. Ren, D., Cai, Z., Song, J., Wu, Z., and Zhou, S. (2014). dsRNA uptake and persistence  
1022 account for tissue-dependent susceptibility to RNA interference in the migratory  
1023 locust, *Locusta migratoria*. *Insect molecular biology* *23*, 175-184.
- 1024 24. Xiao, D., Gao, X., Xu, J., Liang, X., Li, Q., Yao, J., and Zhu, K.Y. (2015). Clathrin-  
1025 dependent endocytosis plays a predominant role in cellular uptake of double-stranded  
1026 RNA in the red flour beetle. *Insect biochemistry and molecular biology* *60*, 68-77.
- 1027 25. Horn, T., and Panfilio, K.A. (2016). Novel functions for *Dorsocross* in epithelial  
1028 morphogenesis in the beetle *Tribolium castaneum*. *Development* *143*, 3002-3011.
- 1029 26. van der Zee, M., Berns, N., and Roth, S. (2005). Distinct functions of the *Tribolium*  
1030 *zerknüllt* genes in serosa specification and dorsal closure. *Curr. Biol.* *15*, 624-636.
- 1031 27. Jacobs, C.G.C., Rezende, G.L., Lamers, G.E.M., and van der Zee, M. (2013). The  
1032 extraembryonic serosa protects the insect egg against desiccation. *Proc. R. Soc. B* *280*,  
1033 20131082.
- 1034 28. Bustin, S.A., Benes, V., Garson, J.A., Hellemans, J., Huggett, J., Kubista, M., Mueller,  
1035 R., Nolan, T., Pfaffl, M.W., Shipley, G.L., et al. (2009). The MIQE guidelines:  
1036 minimum information for publication of quantitative real-time PCR experiments. *Clin.*  
1037 *Chem.* *55*, 611-622.
- 1038 29. Kong, H., Zhu, M., Cui, F., Wang, S., Gao, X., Lu, S., Wu, Y., and Zhu, H. (2014).  
1039 Quantitative assessment of short amplicons in FFPE-derived long-chain RNA.  
1040 *Scientific reports* *4*, 7246.
- 1041 30. Hilbrant, M., Horn, T., Koelzer, S., and Panfilio, K.A. (2016). The beetle amnion and  
1042 serosa functionally interact as apposed epithelia. *eLife* *5*, e13834.
- 1043 31. Svobodova, E., Kubikova, J., and Svoboda, P. (2016). Production of small RNAs by  
1044 mammalian Dicer. *Pflugers Archiv: European journal of physiology* *468*, 1089-1102.
- 1045 32. Arakane, Y., Muthukrishnan, S., Kramer, K.J., Specht, C.A., Tomoyasu, Y., Lorenzen,  
1046 M.D., Kanost, M., and Beeman, R.W. (2005). The *Tribolium* chitin synthase genes  
1047 *TcCHS1* and *TcCHS2* are specialized for synthesis of epidermal cuticle and midgut  
1048 peritrophic matrix. *Insect Mol. Biol.* *14*, 453-463.
- 1049 33. Sarrazin, A.F., Peel, A.D., and Averof, M. (2012). A segmentation clock with two-  
1050 segment periodicity in insects. *Science* *336*, 338-341.
- 1051 34. Berghammer, A.J., Klingler, M., and Wimmer, E.A. (1999). A universal marker for  
1052 transgenic insects. *Nature* *402*, 370-371.

- 1053 35. Koelzer, S., Kölsch, Y., and Panfilio, K.A. (2014). Visualizing late insect  
1054 embryogenesis: Extraembryonic and mesodermal enhancer trap expression in the  
1055 beetle *Tribolium castaneum*. PLoS One 9, e103967.
- 1056 36. Lynch, J.A., and Desplan, C. (2006). A method for parental RNA interference in the  
1057 wasp *Nasonia vitripennis*. Nat. Protoc. 1, 486-494.
- 1058 37. Dönitz, J., Gerischer, L., Hahnke, S., Pfeiffer, S., and Bucher, G. (2018). Expanded  
1059 and updated data and a query pipeline for iBeetle-Base. Nucleic Acids Research 46,  
1060 D831-d835.
- 1061 38. Frank, L.H., and Rushlow, C. (1996). A group of genes required for maintenance of  
1062 the amnioserosa tissue in *Drosophila*. Development 122, 1343-1352.
- 1063 39. Ansari, S., Troelenberg, N., Anh, V.D., Richter, T., Bucher, G., and Klingler, M.  
1064 (2018). Double abdomen in a short-germ insect: Zygotic control of axis formation  
1065 revealed in the beetle *Tribolium castaneum*. Proc. Natl Acad. Sci. USA 115, 1819-  
1066 1824.
- 1067 40. Lord, J.S., Leyland, R., Haines, L.R., Barreaux, A.M.G., Bonsall, M.B., Torr, S.J., and  
1068 English, S. (2021). Effects of maternal age and stress on offspring quality in a  
1069 viviparous fly. Ecol Lett 24, 2113-2122.
- 1070 41. Winston, W.M., Molodowitch, C., and Hunter, C.P. (2002). Systemic RNAi in *C.*  
1071 *elegans* requires the putative transmembrane protein SID-1. Science 295, 2456-2459.
- 1072 42. Huvenne, H., and Smagghe, G. (2010). Mechanisms of dsRNA uptake in insects and  
1073 potential of RNAi for pest control: a review. Journal of insect physiology 56, 227-235.
- 1074 43. Vélez, A.M., and Fishilevich, E. (2018). The mysteries of insect RNAi: A focus on  
1075 dsRNA uptake and transport. Pesticide biochemistry and physiology 151, 25-31.
- 1076 44. Thomas, G.W.C., Dohmen, E., Hughes, D.S.T., Murali, S.C., Poelchau, M., Glastad,  
1077 K., Anstead, C.A., Ayoub, N.A., Batterham, P., Bellair, M., et al. (2020). Gene  
1078 content evolution in the arthropods. Genome Biology 21, 15.
- 1079 45. Kriventseva, E.V., Kuznetsov, D., Tegenfeldt, F., Manni, M., Dias, R., Simao, F.A.,  
1080 and Zdobnov, E.M. (2019). OrthoDB v10: sampling the diversity of animal, plant,  
1081 fungal, protist, bacterial and viral genomes for evolutionary and functional annotations  
1082 of orthologs. Nucleic Acids Research 47, D807-D811.
- 1083 46. Dowling, D., Pauli, T., Donath, A., Meusemann, K., Podsiadlowski, L., Petersen, M.,  
1084 Peters, R.S., Mayer, C., Liu, S., Zhou, X., et al. (2016). Phylogenetic origin and  
1085 diversification of RNAi pathway genes in insects. Genome biology and evolution 8,  
1086 3784-3793.
- 1087 47. Nganso, B.T., Sela, N., and Soroker, V. (2020). A genome-wide screening for RNAi  
1088 pathway proteins in Acari. BMC Genomics 21, 791.
- 1089 48. Panfilio, K.A., Vargas Jentsch, I.M., Benoit, J.B., Erezyilmaz, D., Suzuki, Y.,  
1090 Colella, S., Robertson, H.M., Poelchau, M.F., Waterhouse, R.M., Ioannidis, P., et al.  
1091 (2019). Molecular evolutionary trends and feeding ecology diversification in the  
1092 Hemiptera, anchored by the milkweed bug genome. Genome Biol. 20, 64.
- 1093 49. Wilbrandt, J., Misof, B., Panfilio, K.A., and Niehuis, O. (2019). Repertoire-wide gene  
1094 structure analyses: a case study comparing automatically predicted and manually  
1095 annotated gene models. BMC Genomics 20, 753.
- 1096 50. Young, A.P., Jackson, D.J., and Wyeth, R.C. (2020). A technical review and guide to  
1097 RNA fluorescence *in situ* hybridization. PeerJ 8, e8806.
- 1098 51. Brown, S., Fellers, J., Shippy, T., Denell, R., Stauber, M., and Schmidt-Ott, U. (2001).  
1099 A strategy for mapping *bicoid* on the phylogenetic tree. Curr. Biol. 11, R43-R44.
- 1100 52. Mito, T., Sarashina, I., Zhang, H., Iwahashi, A., Okamoto, H., Miyawaki, K.,  
1101 Shinmyo, Y., Ohuchi, H., and Noji, S. (2005). Non-canonical functions of *hunchback*

- 1102 in segment patterning of the intermediate germ cricket *Gryllus bimaculatus*.  
1103 Development 132, 2069-2079.
- 1104 53. Fritzsche, S., and Hunnekuhl, V.S. (2021). Cell-specific expression and individual  
1105 function of prohormone convertase *PC1/3* in *Tribolium* larval growth highlights major  
1106 evolutionary changes between beetle and fly neuroendocrine systems. *EvoDevo* 12, 9.
- 1107 54. Otieno, M.H.J., Ayieko, M.A., Niassy, S., Salifu, D., Abdelmutalab, A.G.A., Fathiya,  
1108 K.M., Subramanian, S., Fiaboe, K.K.M., Roos, N., Ekesi, S., et al. (2019). Integrating  
1109 temperature-dependent life table data into Insect Life Cycle Model for predicting the  
1110 potential distribution of *Scapsipedus icipe* Hugel & Tanga. *PloS one* 14, e0222941.
- 1111 55. Valdes, V.J., Athie, A., Salinas, L.S., Navarro, R.E., and Vaca, L. (2012). CUP-1 is a  
1112 novel protein involved in dietary cholesterol uptake in *Caenorhabditis elegans*. *PloS*  
1113 *one* 7, e33962.
- 1114 56. Méndez-Acevedo, K.M., Valdes, V.J., Asanov, A., and Vaca, L. (2017). A novel  
1115 family of mammalian transmembrane proteins involved in cholesterol transport.  
1116 *Scientific reports* 7, 7450.
- 1117 57. Pinzón, N., Bertrand, S., Subirana, L., Busseau, I., Escrivá, H., and Seitz, H. (2019).  
1118 Functional lability of RNA-dependent RNA polymerases in animals. *PLoS Genet* 15,  
1119 e1007915.
- 1120 58. Panfilio, K.A., and Angelini, D.R. (2018). By land, air, and sea: hemipteran diversity  
1121 through the genomic lens. *Curr. Opin. Insect Sci.* 25, 106-115.
- 1122 59. Konopova, B., Smykal, V., and Jindra, M. (2011). Common and distinct roles of  
1123 juvenile hormone signaling genes in metamorphosis of holometabolous and  
1124 hemimetabolous insects. *PloS one* 6, e28728.
- 1125 60. Panfilio, K.A., Liu, P.Z., Akam, M., and Kaufman, T.C. (2006). *Oncopeltus fasciatus*  
1126 *zen* is essential for serosal tissue function in katanalapsis. *Dev. Biol.* 292, 226-243.
- 1127 61. Huerta-Cepas, J., Szklarczyk, D., Heller, D., Hernández-Plaza, A., Forslund, S.K.,  
1128 Cook, H., Mende, D.R., Letunic, I., Rattei, T., Jensen, L.J., et al. (2019). eggNOG 5.0:  
1129 a hierarchical, functionally and phylogenetically annotated orthology resource based  
1130 on 5090 organisms and 2502 viruses. *Nucleic Acids Research* 47, D309-d314.
- 1131 62. Cao, M., Gatehouse, J.A., and Fitches, E.C. (2018). A systematic study of RNAi  
1132 effects and dsRNA stability in *Tribolium castaneum* and *Acyrtosiphon pisum*,  
1133 following injection and ingestion of analogous dsRNAs. *International journal of*  
1134 *molecular sciences* 19.
- 1135 63. Peng, Y., Wang, K., Chen, J., Wang, J., Zhang, H., Ze, L., Zhu, G., Zhao, C., Xiao, H.,  
1136 and Han, Z. (2020). Identification of a double-stranded RNA-degrading nuclease  
1137 influencing both ingestion and injection RNA interference efficiency in the red flour  
1138 beetle *Tribolium castaneum*. *Insect biochemistry and molecular biology* 125, 103440.
- 1139 64. Song, X.S., Gu, K.X., Duan, X.X., Xiao, X.M., Hou, Y.P., Duan, Y.B., Wang, J.X.,  
1140 Yu, N., and Zhou, M.G. (2018). Secondary amplification of siRNA machinery limits  
1141 the application of spray-induced gene silencing. *Mol Plant Pathol* 19, 2543-2560.
- 1142 65. Yoshikawa, M., Han, Y.W., Fujii, H., Aizawa, S., Nishino, T., and Ishikawa, M.  
1143 (2021). Cooperative recruitment of RDR6 by SGS3 and SDE5 during small interfering  
1144 RNA amplification in *Arabidopsis*. *Proceedings of the National Academy of Sciences*  
1145 *of the United States of America* 118.
- 1146 66. Zhang, C., and Ruvkun, G. (2012). New insights into siRNA amplification and RNAi.  
1147 *RNA Biol* 9, 1045-1049.
- 1148 67. Guo, W.C., Fu, K.Y., Yang, S., Li, X.X., and Li, G.Q. (2015). Instar-dependent  
1149 systemic RNA interference response in *Leptinotarsa decemlineata* larvae. *Pesticide*  
1150 *biochemistry and physiology* 123, 64-73.



- 1151 68. Peel, A.D., and Akam, M. (2007). The dynamics of yolk deposition in the desert  
1152 locust *Schistocerca gregaria*. *J. Insect Physiol.* 53, 436-443.
- 1153 69. Trauner, J., Schinko, J., Lorenzen, M.D., Shippy, T.D., Wimmer, E.A., Beeman,  
1154 R.W., Klingler, M., Bucher, G., and Brown, S.J. (2009). Large-scale insertional  
1155 mutagenesis of a coleopteran stored grain pest, the red flour beetle *Tribolium*  
1156 *castaneum*, identifies embryonic lethal mutations and enhancer traps. *BMC Biol.* 7,  
1157 73.
- 1158 70. van Drongelen, R., Vazquez-Faci, T., Huijben, T.A.P.M., van der Zee, M., and Idema,  
1159 T. (2018). Mechanics of epithelial tissue formation. *J. Theor. Biol.* 454, 182-189.
- 1160 71. Herndon, N., Shelton, J., Gerischer, L., Ioannidis, P., Ninova, M., Dönitz, J.,  
1161 Waterhouse, R.M., Liang, C., Damm, C., Siemanowski, J., et al. (2020). Enhanced  
1162 genome assembly and a new official gene set for *Tribolium castaneum* - from a draft  
1163 to a reference genome. *BMC Genomics* 21, 47.
- 1164 72. Ruijter, J.M., Ramakers, C., Hoogaars, W.M., Karlen, Y., Bakker, O., van den Hoff,  
1165 M.J., and Moorman, A.F. (2009). Amplification efficiency: linking baseline and bias  
1166 in the analysis of quantitative PCR data. *Nucleic Acids Research* 37, e45.
- 1167 73. Tuomi, J.M., Voorbraak, F., Jones, D.L., and Ruijter, J.M. (2010). Bias in the Cq  
1168 value observed with hydrolysis probe based quantitative PCR can be corrected with  
1169 the estimated PCR efficiency value. *Methods (San Diego, Calif.)* 50, 313-322.
- 1170 74. Stappert, D. (2014). Two novel, complementary next generation sequencing  
1171 approaches to reveal the dorso-ventral gene regulatory network of *Tribolium*  
1172 *castaneum*. In Mathematisch-Naturwissenschaftliche Fakultät, Volume Ph.D. (Köln:  
1173 Universität zu Köln), 154 pages. <https://kups.ub.uni-koeln.de/5620/>.
- 1174 75. , C.S.H.P. (2011). Hoyer's Medium. *Cold Spring Harb. Protoc.* 2011, pdb.rec12429.
- 1175 76. Thompson, J.D., Higgins, D.G., and Gibson, T.J. (1994). CLUSTAL W: improving  
1176 the sensitivity of progressive multiple sequence alignment through sequence  
1177 weighting, position-specific gap penalties and weight matrix choice. *Nucleic Acids*  
1178 *Research* 22, 4673-4680.
- 1179 77. Dereeper, A., Guignon, V., Blanc, G., Audic, S., Buffet, S., Chevenet, F., Dufayard,  
1180 J.F., Guindon, S., Lefort, V., Lescot, M., et al. (2008). Phylogeny.fr: robust  
1181 phylogenetic analysis for the non-specialist *Nucleic Acids Res.* 36(*Web Server issue*),  
1182 W465-W469.
- 1183 78. Poelchau, M., Childers, C., Moore, G., Tsavatapalli, V., Evans, J., Lee, C.Y., Lin, H.,  
1184 Lin, J.W., and Hackett, K. (2015). The i5k Workspace@NAL--enabling genomic data  
1185 access, visualization and curation of arthropod genomes. *Nucleic Acids Research* 43,  
1186 D714-719.
- 1187 79. Armisen, D., Rajakumar, R., Friedrich, M., Benoit, J.B., Robertson, H.M., Panfilio,  
1188 K.A., Ahn, S.-J., Poelchau, M.F., Chao, H., Dinh, H., et al. (2018). The genome of the  
1189 water strider *Gerris buenoi* reveals expansions of gene repertoires associated with  
1190 adaptations to life on the water. *BMC Genomics* 19, 832.
- 1191 80. Benoit, J.B., Adelman, Z.N., Reinhardt, K., Dolan, A., Poelchau, M., Jennings, E.C.,  
1192 Szuter, E.M., Hagan, R.W., Gujar, H., Shukla, J., et al. (2016). Unique features of a  
1193 global human ectoparasite identified through sequencing of the bed bug genome. *Nat.*  
1194 *Commun.* 7, 10165.
- 1195 81. Mesquita, R.D., Vionette-Amaral, R.J., Lowenberger, C., Rivera-Pomar, R., Monteiro,  
1196 F.A., Minx, P., Spieth, J., Carvalho, A.B., Panzera, F., Lawson, D., et al. (2015).  
1197 Genome of *Rhodnius prolixus*, an insect vector of Chagas disease, reveals unique  
1198 adaptations to hematophagy and parasite infection. *Proc. Natl. Acad. Sci. USA* doi:  
1199 [10.1073/pnas.1506226112](https://doi.org/10.1073/pnas.1506226112).

- 1200 82. Sparks, M.E., Bansal, R., Benoit, J.B., Blackburn, M.B., Chao, H., Chen, M., Cheng,  
1201 S., Childers, C., Dinh, H., Doddapaneni, H.V., et al. (2020). Brown marmorated stink  
1202 bug, *Halyomorpha halys* (Stål), genome: putative underpinnings of polyphagy,  
1203 insecticide resistance potential and biology of a top worldwide pest. *BMC Genomics*  
1204 *21*, 227.
- 1205 83. Rotenberg, D., Baumann, A.A., Ben-Mahmoud, S., Christiaens, O., Dermauw, W.,  
1206 Ioannidis, P., Jacobs, C.G.C., Vargas Jentzsch, I.M., Oliver, J.E., Poelchau, M.F., et  
1207 al. (2020). Genome-enabled insights into the biology of thrips as crop pests. *BMC*  
1208 *biology* *18*, 142.
- 1209 84. Oeyen, J.P., Baa-Puyoulet, P., Benoit, J.B., Beukeboom, L.W., Bornberg-Bauer, E.,  
1210 Buttstedt, A., Calevro, F., Cash, E.I., Chao, H., Charles, H., et al. (2020). Sawfly  
1211 genomes reveal evolutionary acquisitions that fostered the mega-radiation of  
1212 parasitoid and eusocial Hymenoptera. *Genome biology and evolution*.
- 1213 85. McKenna, D.D., Scully, E.D., Pauchet, Y., Hoover, K., Kirsch, R., Geib, S.M.,  
1214 Mitchell, R.F., Waterhouse, R.M., Ahn, S.-J., Arsala, D., et al. (2016). Genome of the  
1215 Asian longhorned beetle (*Anoplophora glabripennis*), a globally significant invasive  
1216 species, reveals key functional and evolutionary innovations at the beetle–plant  
1217 interface. *Genome Biol.* *17*, 227.
- 1218 86. Schoville, S.D., Chen, Y.H., Andersson, M.N., Benoit, J.B., Bhandari, A., Bowsher,  
1219 J.H., Brevik, K., Cappelle, K., Chen, M.M., Childers, A.K., et al. (2018). A model  
1220 species for agricultural pest genomics: the genome of the Colorado potato beetle,  
1221 *Leptinotarsa decemlineata* (Coleoptera: Chrysomelidae). *Scientific reports* *8*, 1931.
- 1222 87. Heger, P., Zheng, W., Rottmann, A., Panfilio, K.A., and Wiehe, T. (2020). The  
1223 genetic factors of bilaterian evolution. *eLife* *9*, e45530.
- 1224 88. Johnson, K.P., Dietrich, C.H., Friedrich, F., Beutel, R.G., Wipfler, B., Peters, R.S.,  
1225 Allen, J.M., Petersen, M., Donath, A., Walden, K.K.O., et al. (2018). Phylogenomics  
1226 and the evolution of hemipteroid insects. *Proceedings of the National Academy of*  
1227 *Sciences of the United States of America* *115*, 12775-12780.
- 1228 89. Kopp, A., and True, J.R. (2002). Phylogeny of the Oriental *Drosophila melanogaster*  
1229 species group: a multilocus reconstruction. *Syst Biol* *51*, 786-805.
- 1230 90. Mou, S.-l., Zeng, Q.-t., Yang, Y., Qian, Y.-h., and Hiu, G.-a. (2005). Phylogeny of  
1231 *melanogaster* species group inferred from ND4L and ND4 genes. *Zool. Res.* *26*, 344-  
1232 349.  
1233

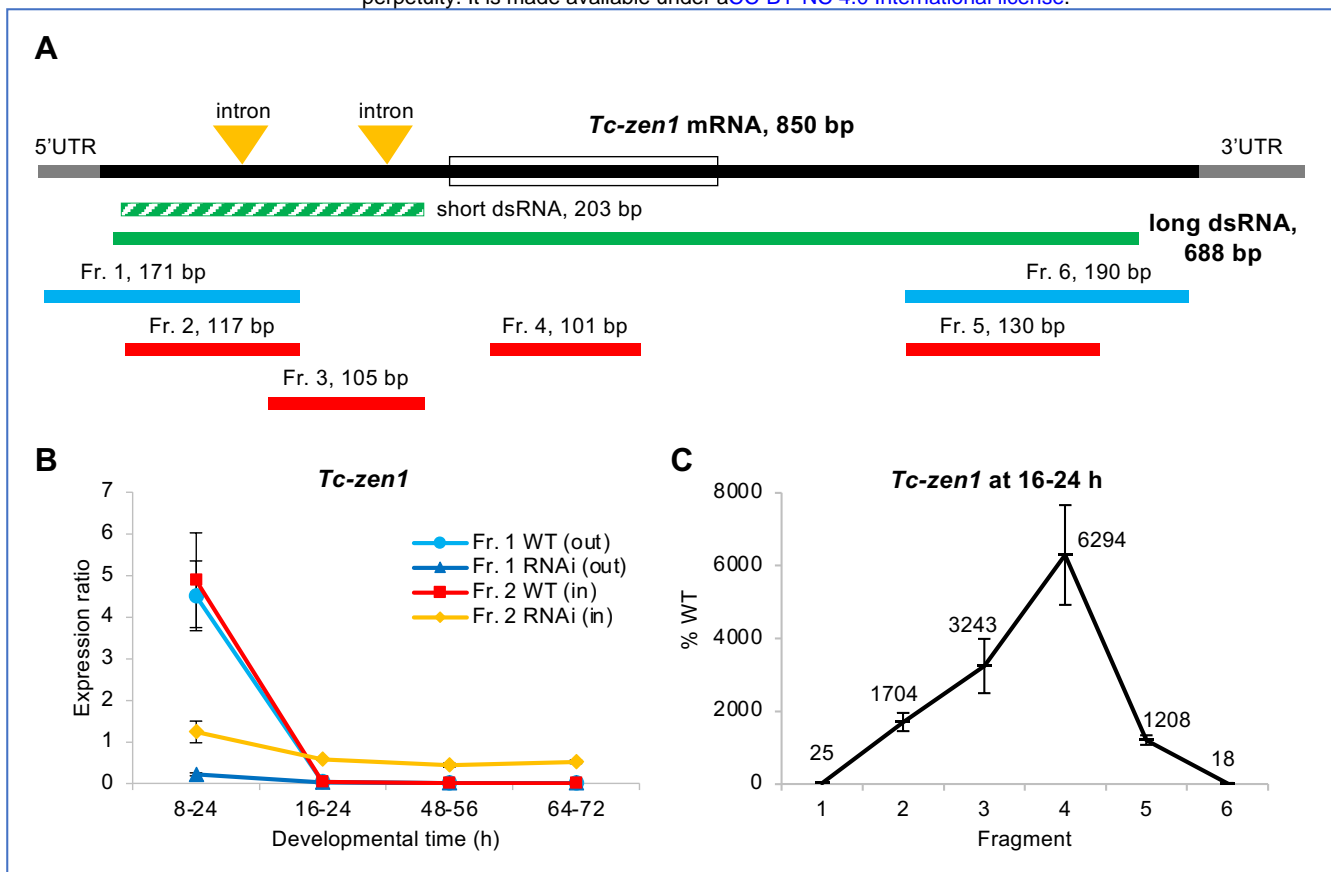

**Figure 1. Long dsRNA molecules are transmitted maternally and persist throughout embryogenesis after parental RNAi for *Tc-zen1*.**

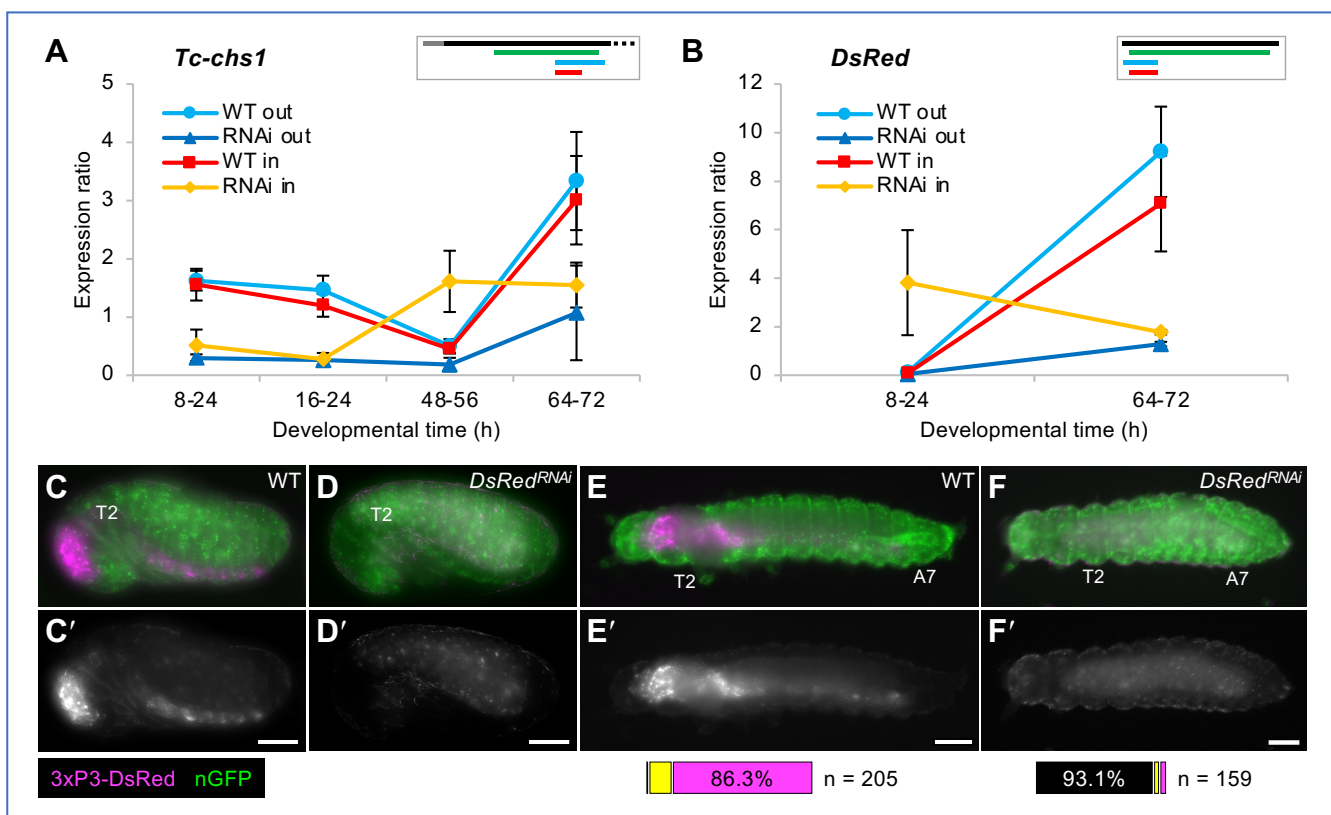

**Figure 2. Maternal transmission of dsRNA occurs for diverse genes with distinct expression profiles.**

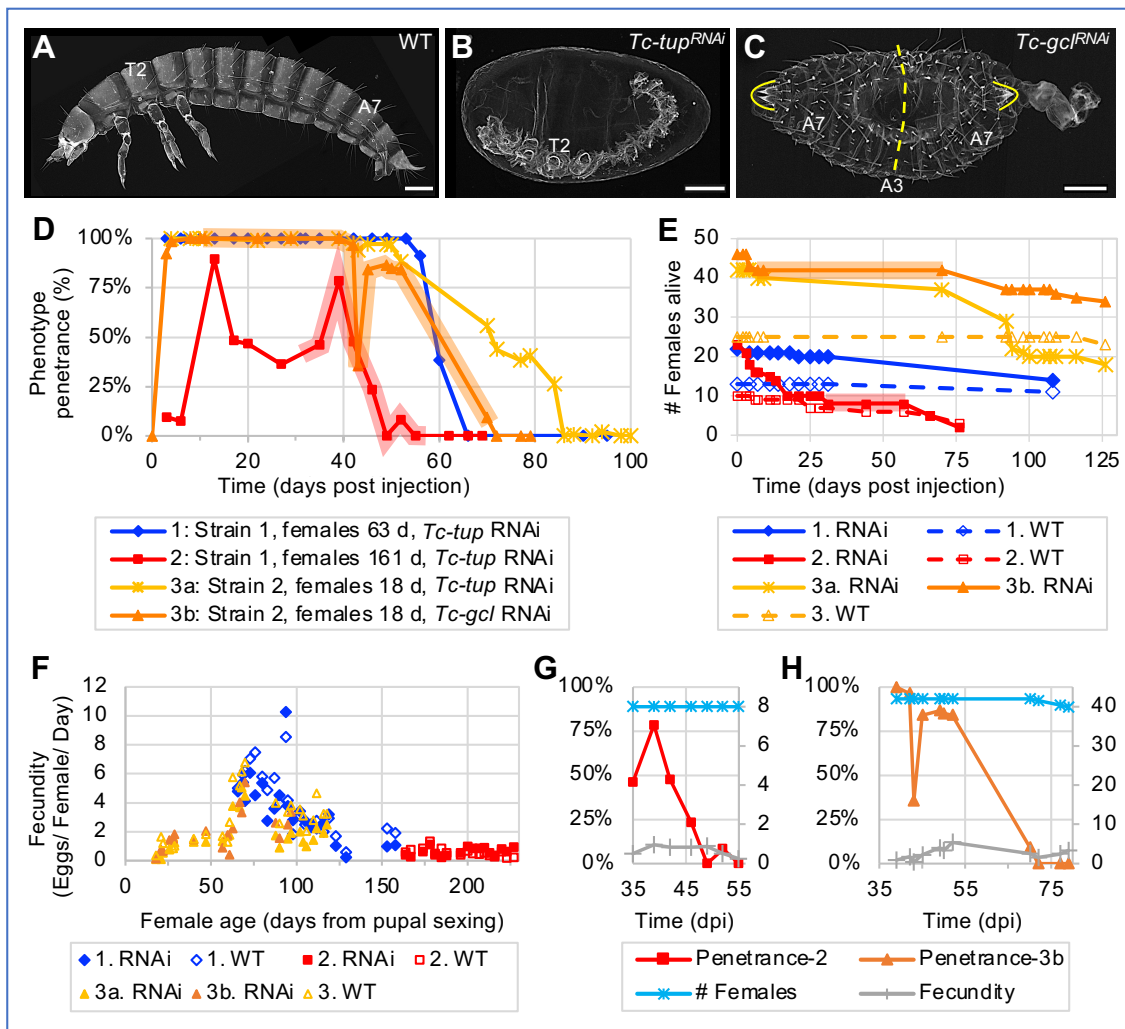

**Figure 3. Systemic parental RNAi persists at high levels for months before fully waning.**

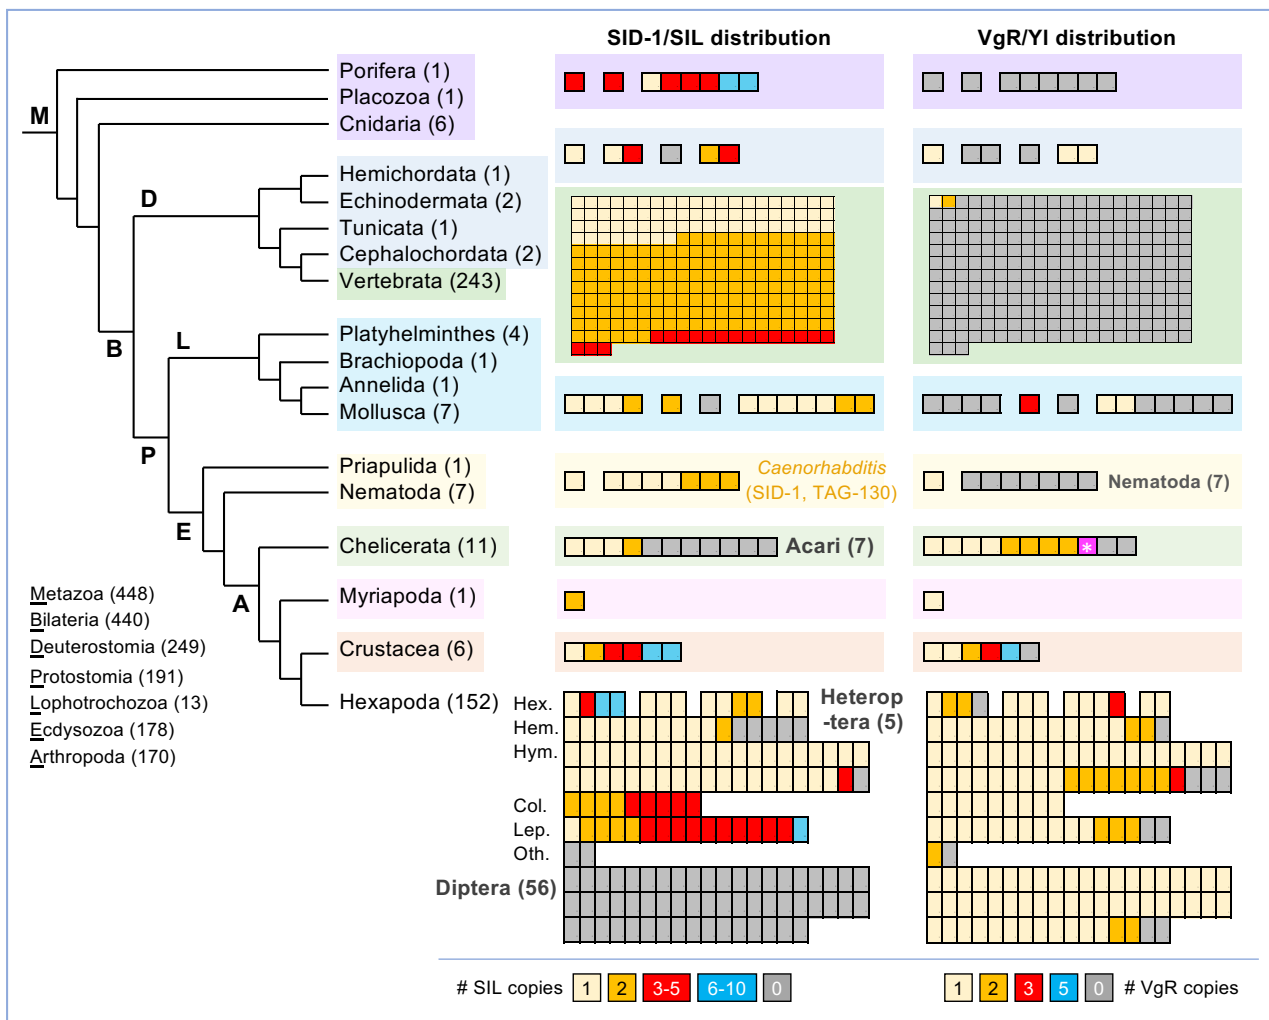

**Figure 4. Visualization of metazoan orthology clustering reveals macro-evolutionary patterns of protein conservation and lineage-specific losses.**

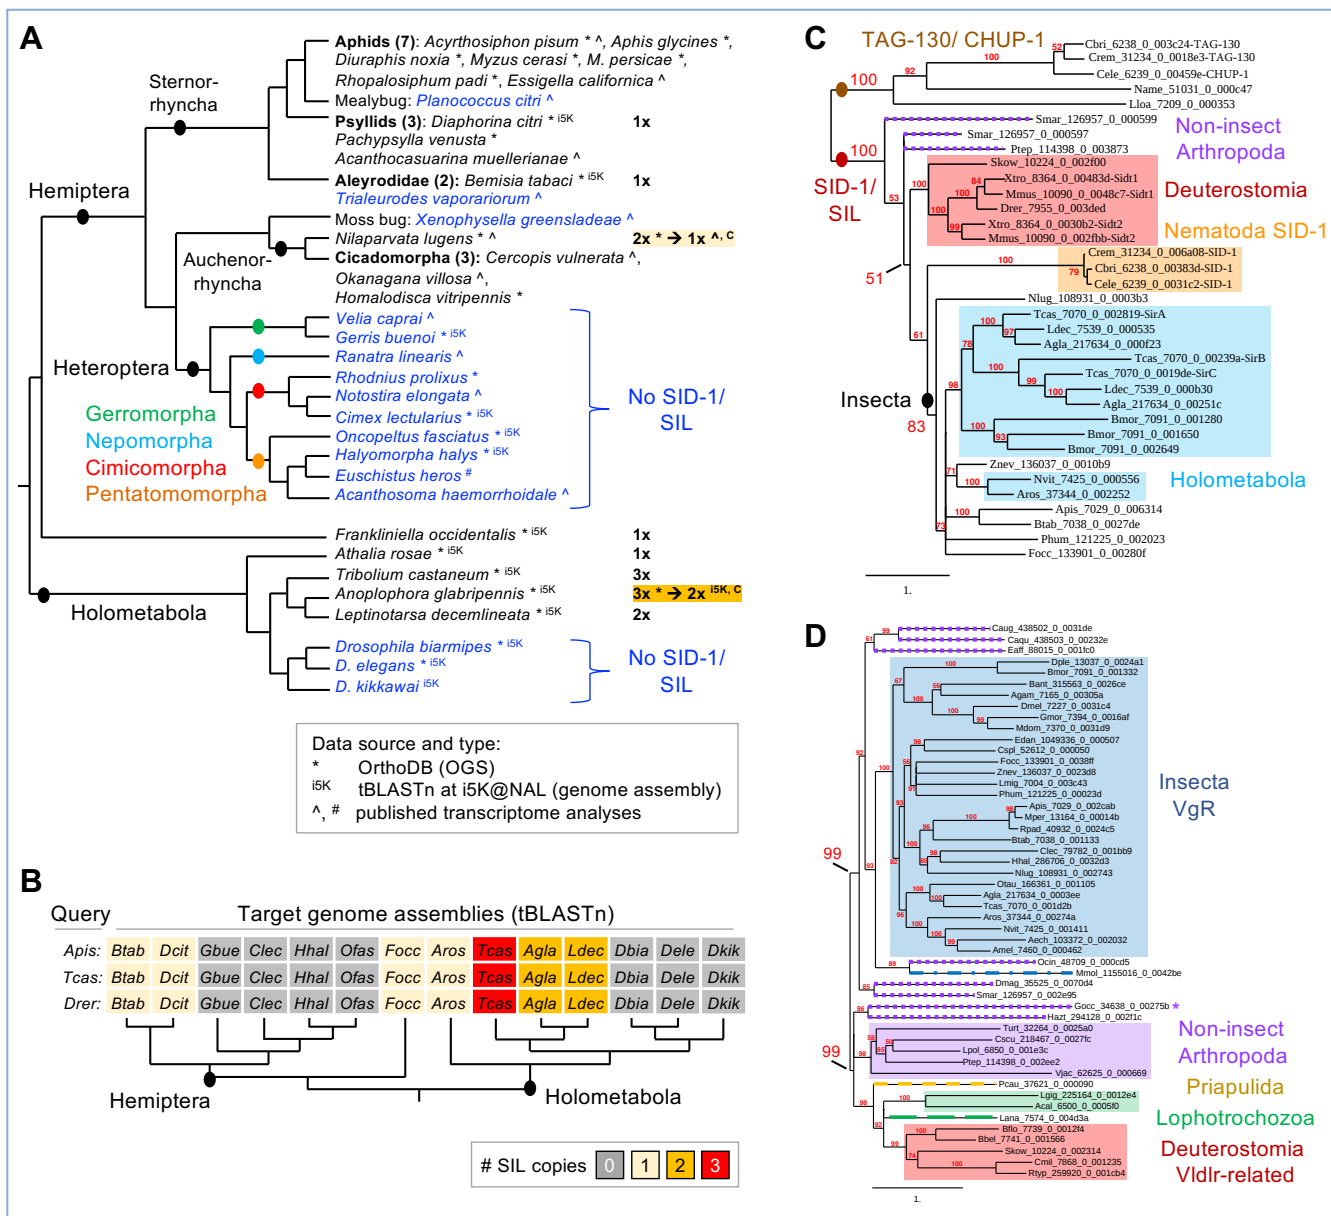

**Figure 6.**  
**Tighter developmental staging**  
**mitigates underestimation of**  
**RNAi knockdown when**  
**assayed with a nested qPCR**  
**amplicon.**

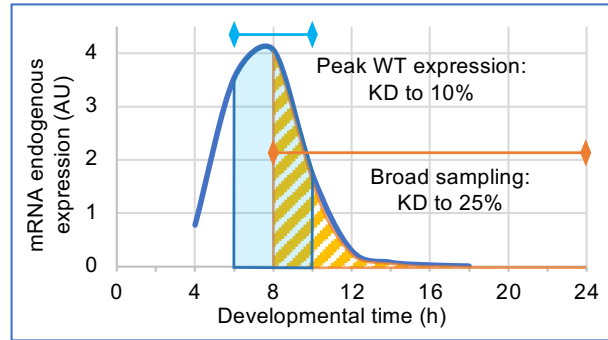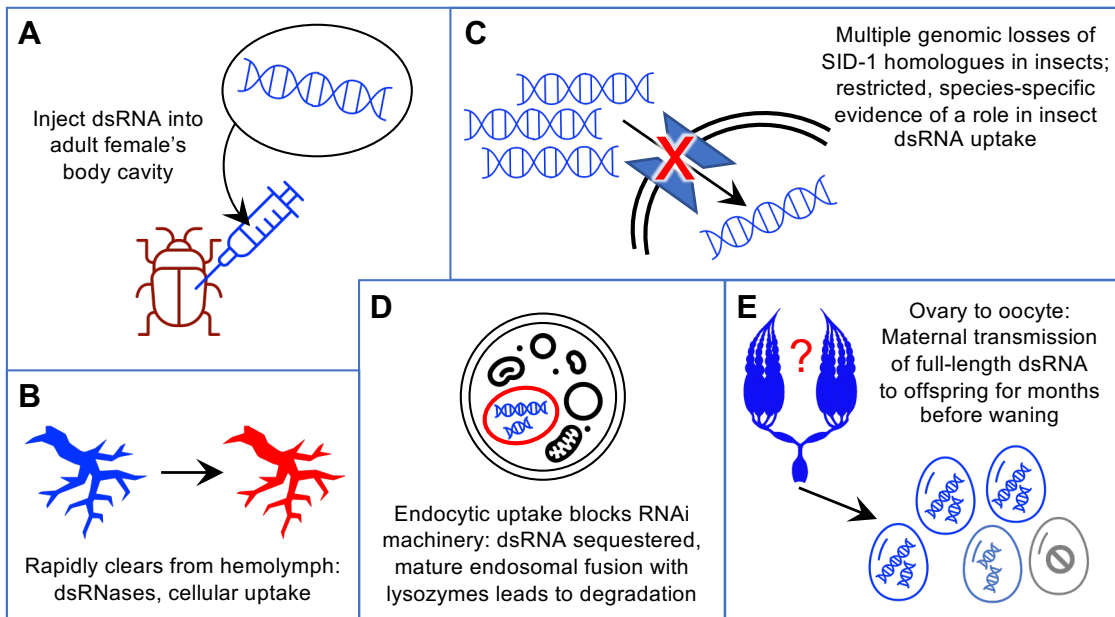

**Figure 7. Unresolved features of systemic parental RNAi.**

## Supplementary Figure and Tables



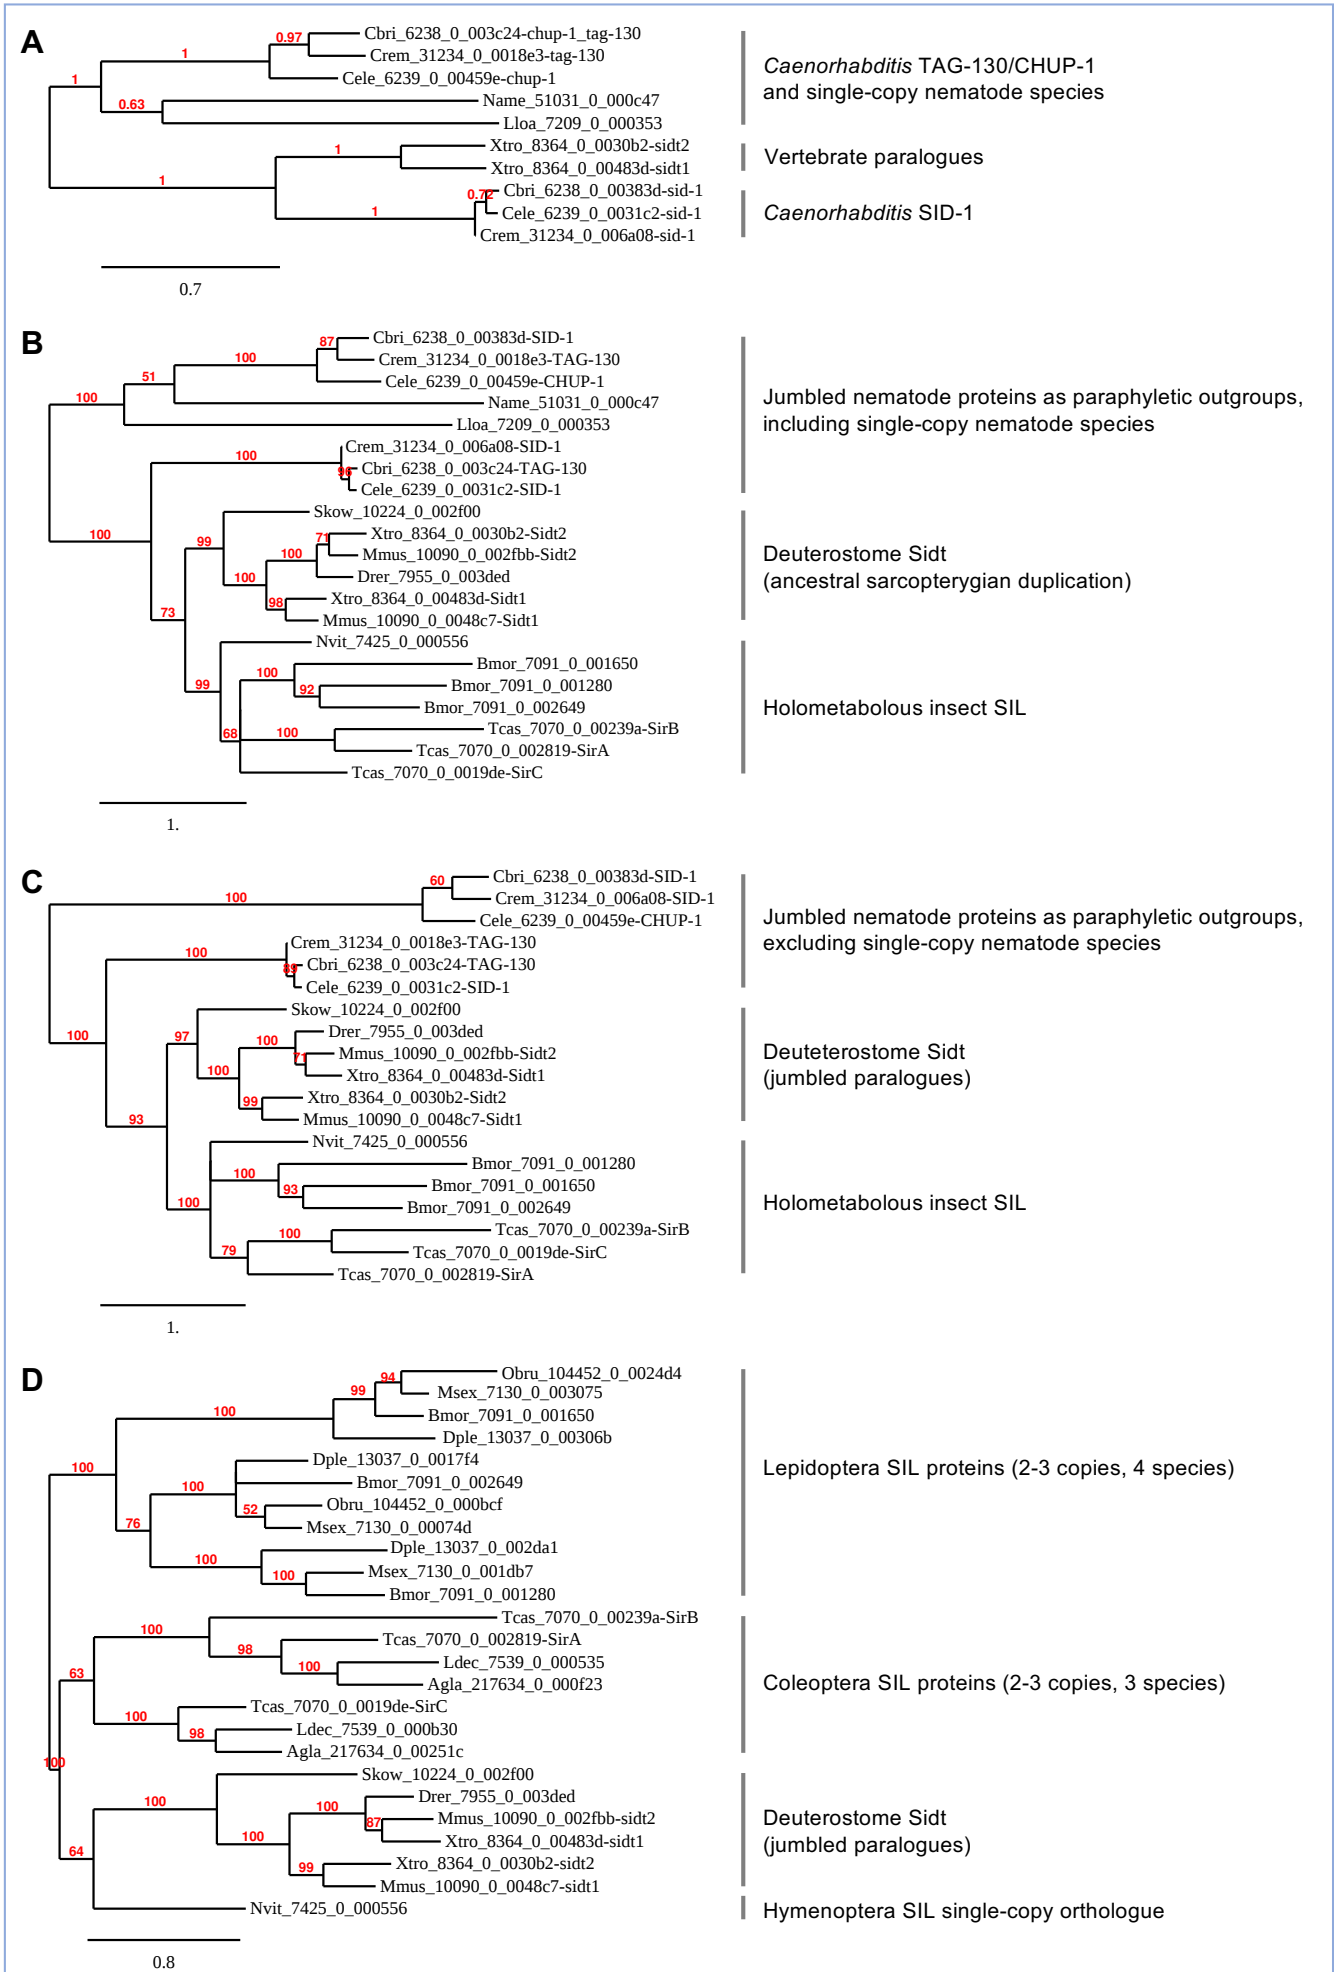

**Figure S1. Additional phylogenies with species subsampling for SID-1/SIL proteins.**

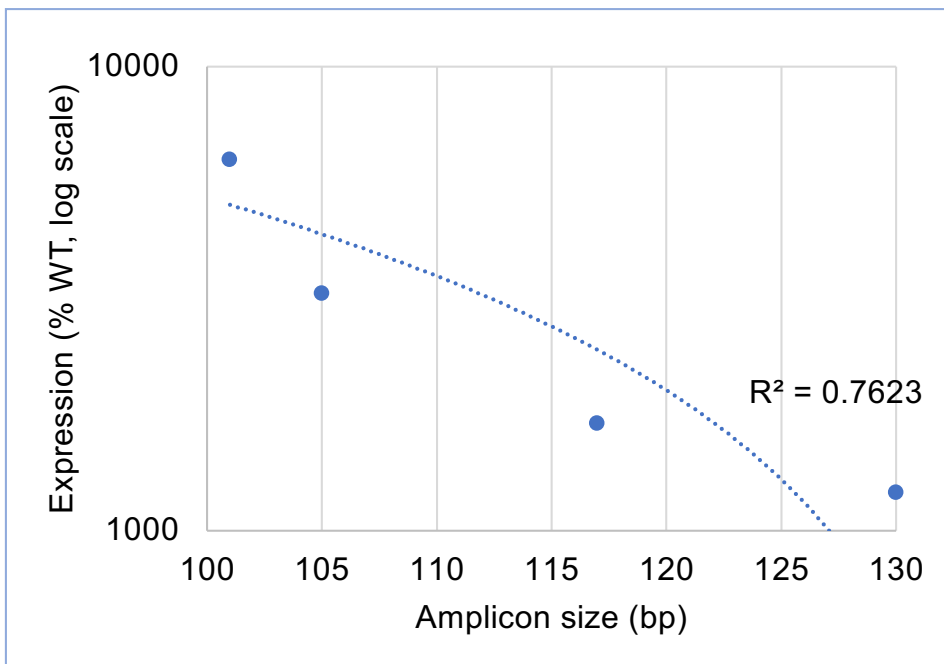

**Figure S2. Negative correlation of nested RT-qPCR amplicon length and detection of dsRNA.**

**Table S1. Primers used in the study.** Note that primers for RNAi (dsRNA synthesis) also included an adapter sequence, 5'-GGCCGCGG-3' (forward primers) or 5'-CCCGGGGC-3' (reverse primers), for subsequent amplification with T7 promoter universal primers (adapters not shown in table). The T7 universal primers are: 5'-universal primer 5'-GAGAATTCTAATACGACTCACTATAGGGCCGCGG-3', and 3'-universal primer 5'-AGGGATCCTAATACGACTCACTATAGGGCCCGGGGC-3'.

| Application    | Gene and fragment ID                   | Primer direction      | Sequence (5' to 3')    | Amplicon length (bp) |
|----------------|----------------------------------------|-----------------------|------------------------|----------------------|
| <b>RNAi</b>    |                                        |                       |                        |                      |
|                | <i>Tc-zen1</i> (TC000921)              | forward               | TCCCAATTTGAAAACCAAGC   | 688                  |
|                |                                        | reverse               | CGTTCCACCCTTCCTGATAA   |                      |
|                | <i>Tc-chs1</i> (TC014634)              | forward (F1)          | CACCAGGACTGTGCA        | 390                  |
|                |                                        | reverse (R1)          | GGCTTTTTGGACGAT        |                      |
|                | <i>DsRed2</i> (EU257621.1)             | forward               | AGTTCATGCGCTTCAAGGTG   | 600                  |
|                |                                        | reverse               | TGGTGTAGTCCTCGTTGTGG   |                      |
|                | <i>Tc-tup</i> (TC033536), <i>NOF 1</i> | forward (F1)          | CGTGCGAGATGGTAAAACCT   | 306                  |
|                |                                        | reverse (R1)          | TTGCTCAAGCTGGTGTGTT    |                      |
|                | <i>Tc-tup</i> (TC033536), <i>NOF 2</i> | forward (F2)          | CACGTTGAGGACGTGCTATG   | 347                  |
|                |                                        | reverse (R2)          | GCTGATGGGGTTGCTCTAAG   |                      |
|                | <i>Tc-gcl</i> (TC001571)               | forward (F1)          | CGTTGATCAGTGGTGTGCA    | 437                  |
|                |                                        | reverse (R1)          | TCGCTTCCTCCAGAAATGT    |                      |
| <b>RT-qPCR</b> |                                        |                       |                        |                      |
|                | <i>Tc-RpS3</i> (TC008261)              | forward               | ACCTCGATACACCATAGCAAGC | 186                  |
|                |                                        | reverse               | ACCGTCGTATTCGTGAATTGAC |                      |
|                | <i>Tc-zen1</i> (5'-3'):                |                       |                        |                      |
|                | Fragment 1 outside dsRNA               | forward               | TCCTGTTGTGAGTCAGTGCA   | 223                  |
|                |                                        | reverse               | CAGTTCCAATCAGAAGGTGGA  |                      |
|                | Fragment 2 inside dsRNA                | forward               | TGAAAACCAAGCCGTTCTGC   | 169                  |
|                |                                        | reverse               | CAGTTCCAATCAGAAGGTGGA  |                      |
|                | Fragment 3 inside dsRNA                | forward               | TCCACCTTCTGATTGGAAGT   | 161                  |
|                |                                        | reverse               | CGTTGGGGTTGAGTTTCTTG   |                      |
|                | Fragment 4 inside dsRNA                | forward               | CGGCCCAATTAGTGGAATTA   | 101                  |
|                |                                        | reverse               | ACGCTCACTCAGGTTCAAGT   |                      |
|                | Fragment 5 inside dsRNA                | forward               | CCATCGACAGTGCAAACCAA   | 130                  |
|                |                                        | reverse               | TCCTCTTGTTTGGGCAAAGC   |                      |
|                | Fragment 6 outside dsRNA               | forward               | CCATCGACAGTGCAAACCAA   | 190                  |
|                |                                        | reverse               | GTTAAAGCAGGCTGGGACAC   |                      |
|                | <i>Tc-chs1</i> (3')                    | forward               | ATTCTGTAACCGGGACCTGG   |                      |
|                |                                        | reverse inside dsRNA  | CCAGAAGGCGAAGATCAAGC   | 100                  |
|                |                                        | reverse outside dsRNA | ATGAGGAAGTGGGAGAAGGC   | 186                  |
|                | <i>DsRed</i> (5')                      | forward inside dsRNA  | AGTTCATGCGCTTCAAGGTG   | 123                  |
|                |                                        | forward outside dsRNA | GCTCCTCCAAGAACGTCATC   | 147                  |
|                |                                        | reverse               | CCTTGGTCACCTTCAGCTTC   |                      |

**Table S2. Genome assembly versions queried by BLAST.** These resources were interrogated with tBLASTn queries for selected SID-1 proteins (see main text Figure 5B). Accessed at the i5K@NAL site, most recent access date: 13 October 2021.

| Taxonomic grouping                        | Species                           | Species abbreviation | Assembly version                                                                                   |
|-------------------------------------------|-----------------------------------|----------------------|----------------------------------------------------------------------------------------------------|
| Paraneoptera > Hemiptera > Sternorrhyncha | <i>Bemisia tabaci</i>             | Btab                 | Genome Assembly - Bemisia tabaci genome assembly GCF_001854935.1 (ASM185493v1)                     |
| Paraneoptera > Hemiptera > Sternorrhyncha | <i>Diaphorina citri</i>           | Dcit                 | Genome Assembly - NCBI-diaci1.1 (Current RefSeq assembly version)                                  |
| Paraneoptera > Hemiptera > Heteroptera    | <i>Gerris buenoi</i>              | Gbue                 | Genome Assembly - Gbue.scaffolds.50_new_ids.fa                                                     |
| Paraneoptera > Hemiptera > Heteroptera    | <i>Cimex lectularius</i>          | Clec                 | Genome Assembly - Clec_Bbug02212013.genome_new_ids.fa                                              |
| Paraneoptera > Hemiptera > Heteroptera    | <i>Halyomorpha halys</i>          | Hhal                 | Genome Assembly - Halyomorpha halys genome assembly GCA_000696795.3                                |
| Paraneoptera > Hemiptera > Heteroptera    | <i>Oncopeltus fasciatus</i>       | Ofas                 | Genome Assembly - Ofas.scaffolds_new_ids.fa                                                        |
| Paraneoptera > Thysanoptera               | <i>Frankliniella occidentalis</i> | Focc                 | Genome Assembly - Frankliniella occidentalis genome assembly GCA_000697945.4                       |
| Holometabola > Hymenoptera                | <i>Athalia rosae</i>              | Aros                 | Genome Assembly - Aros01112013-genome_new_ids.fa                                                   |
| Holometabola > Coleoptera                 | <i>Anoplophora glabripennis</i>   | Agla                 | Genome Assembly - Agla_Btl03082013.genome_new_ids.fa                                               |
| Holometabola > Coleoptera                 | <i>Leptinotarsa decemlineata</i>  | Ldec                 | Genome Assembly - Leptinotarsa decemlineata genome assembly GCF_000500325.1                        |
| Holometabola > Coleoptera                 | <i>Tribolium castaneum</i>        | Tcas                 | Genome Assembly - Tribolium castaneum genome assembly Tcas5.2 (GCF_000002335.3), genomic scaffolds |
| Holometabola > Diptera                    | <i>Drosophila biarmipes</i>       | Dbia                 | Genome Assembly - Drosophila biarmipes genome assembly GCF_000233415.1                             |
| Holometabola > Diptera                    | <i>Drosophila elegans</i>         | Dele                 | Genome Assembly - Drosophila elegans genome assembly, ASM1815250v1                                 |
| Holometabola > Diptera                    | <i>Drosophila kikkawai</i>        | Dkik                 | Genome Assembly - Drosophila kikkawai genome assembly, ASM1815253v1                                |
